## RESEARCH ARTICLE

# Indenyl-thiazole and indenyl-formazan derivatives: Synthesis, anticancer screening studies, molecular-docking, and pharmacokinetic/ molin-spiration properties

Ghaidaa H. Alfaifi<sup>1</sup>, Thoraya A. Farghaly<sup>1\*</sup>, Magda H. Abdellattif<sup>2</sup><sup>1</sup> Chemistry Department, Faculty of Applied Sciences, Umm Al-Qura University, Makkah, Saudi Arabia,<sup>2</sup> Department of Chemistry, College of Science, Taif University, Taif, Saudi Arabia\* [thoraya-f@hotmail.com](mailto:thoraya-f@hotmail.com), [tamohamed@uqu.edu.sa](mailto:tamohamed@uqu.edu.sa)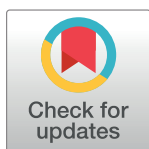

## OPEN ACCESS

**Citation:** Alfaifi GH, Farghaly TA, Magda H. Abdellattif (2023) Indenyl-thiazole and indenyl-formazan derivatives: Synthesis, anticancer screening studies, molecular-docking, and pharmacokinetic/ molin-spiration properties. PLoS ONE 18(3): e0274459. <https://doi.org/10.1371/journal.pone.0274459>

**Editor:** Afzal Basha Shaik, Vignan Pharmacy College, INDIA

**Received:** May 18, 2022

**Accepted:** August 29, 2022

**Published:** March 1, 2023

**Copyright:** © 2023 Alfaifi et al. This is an open access article distributed under the terms of the [Creative Commons Attribution License](https://creativecommons.org/licenses/by/4.0/), which permits unrestricted use, distribution, and reproduction in any medium, provided the original author and source are credited.

**Data Availability Statement:** All relevant data are within the manuscript and its [Supporting Information](#) files.

**Funding:** The authors would like to thank the Deanship of Scientific Research at Umm Al-Qura University for supporting this work by Grant Code: (22UQU4350477DSR16).

**Competing interests:** The authors have declared that no competing interests exist.

## Abstract

Two new series of thiazole and formazan linked to 5-Bromo-indan were synthesized, and their structures were assured based on all possible analytical techniques. The size of the tested derivatives was calculated from the XRD technique and found five derivatives **3**, **10a**, **14a**, **15**, and **16** on the nanosized scale. The two series were tested for their efficacy and toxicity as anti-colon and stomach cancers. Derivative **10d** showed activity more than the two reference drugs used in the case of SNU-16. Surpislly, in the case of COLO205, five derivatives **4**, **6c**, **6d**, **6e**, and **10a** are better than the two benchmarks used, and two derivatives, **14a** and **14b** more potent than cisplatin. All potent derivatives showed a strong fit with the active site of the two tested proteins (gastric cancer (PDB = **2BID**) and colon cancer (PDB = **2A4L**)) in the molecular docking study. The Pharmacophore and ADME studies of the new derivatives showed that most derivatives revealed promising bioactivity, which indicates the drug-likeness properties against kinase inhibitors, protease, and enzyme inhibitors. In addition, the ProTox-II showed that the four compounds **10d**, **16**, **6d**, and **10a** are predicted to have oral LD<sub>50</sub> values ranging from 335 to 3500 mg/kg in a rat model with (1 s,4 s)-Eucalyptol bearing the highest values and quercetin holding the lowest one.

## 1. Introduction

Different types of cancer are considered the most dangerous and deadly diseases globally [1, 2]. Numerous attempts have been made to find suitable ways to treat cancer. Chemotherapy is the primary approach in cancer treatment, where various natural and synthetic compounds are used to destroy cancer cells [3]. Despite the rapid advances in pharmacology and chemotherapeutic agents, the treatment of cancers remains a serious problem due to the toxicity, resistance, and lack selectivity of currently available anticancer drugs [4]. So far, the search is still going on for new compounds that are suitable and effective in treating different types of cancer [5–8]. On the other hand, nanoscale synthesis of heterocyclic materials is a scientific achievement due to its amazing applications in all medical and industrial fields [9, 10]. Heterocyclic-nanocomposites have effective biological activities due to their small size, allowing easy

penetration of viral or microbial cell membranes [11, 12]. By browsing the heterocyclic compounds, we noted that thiazole derivatives spread in natural and industrial medicines, as they are a major part of cancer, histamine, microbes, and pressure medicines [13–15]. Several thiazoles with antiviral [16], antioxidant [17], antimicrobial [18], anticonvulsant [19], anti-inflammatory [20], and neuroprotective activities [21] are reported.

Fig 1 collected some drugs containing thiazole moiety. Another treasure of organic compounds is formazan derivatives with the general formula  $(-N = NC = NN -)$  [22] have been widely studied due to their numerous applications in the health and industrial field [23]. Multiple studies of the synthesis and applications of formazan derivatives showed that they have potent effects as antiparkinsonian [24], antiviral [25], antibacterial [26], antioxidant [27], anti-inflammatory [28], and anticancer activities [29]. Cyclic formazan derivatives are good indicators, especially for lithium-ion in blood [30]. Combining all the above findings with our research project concerning the synthesis of bioactive heterocyclic compounds [31–35], we

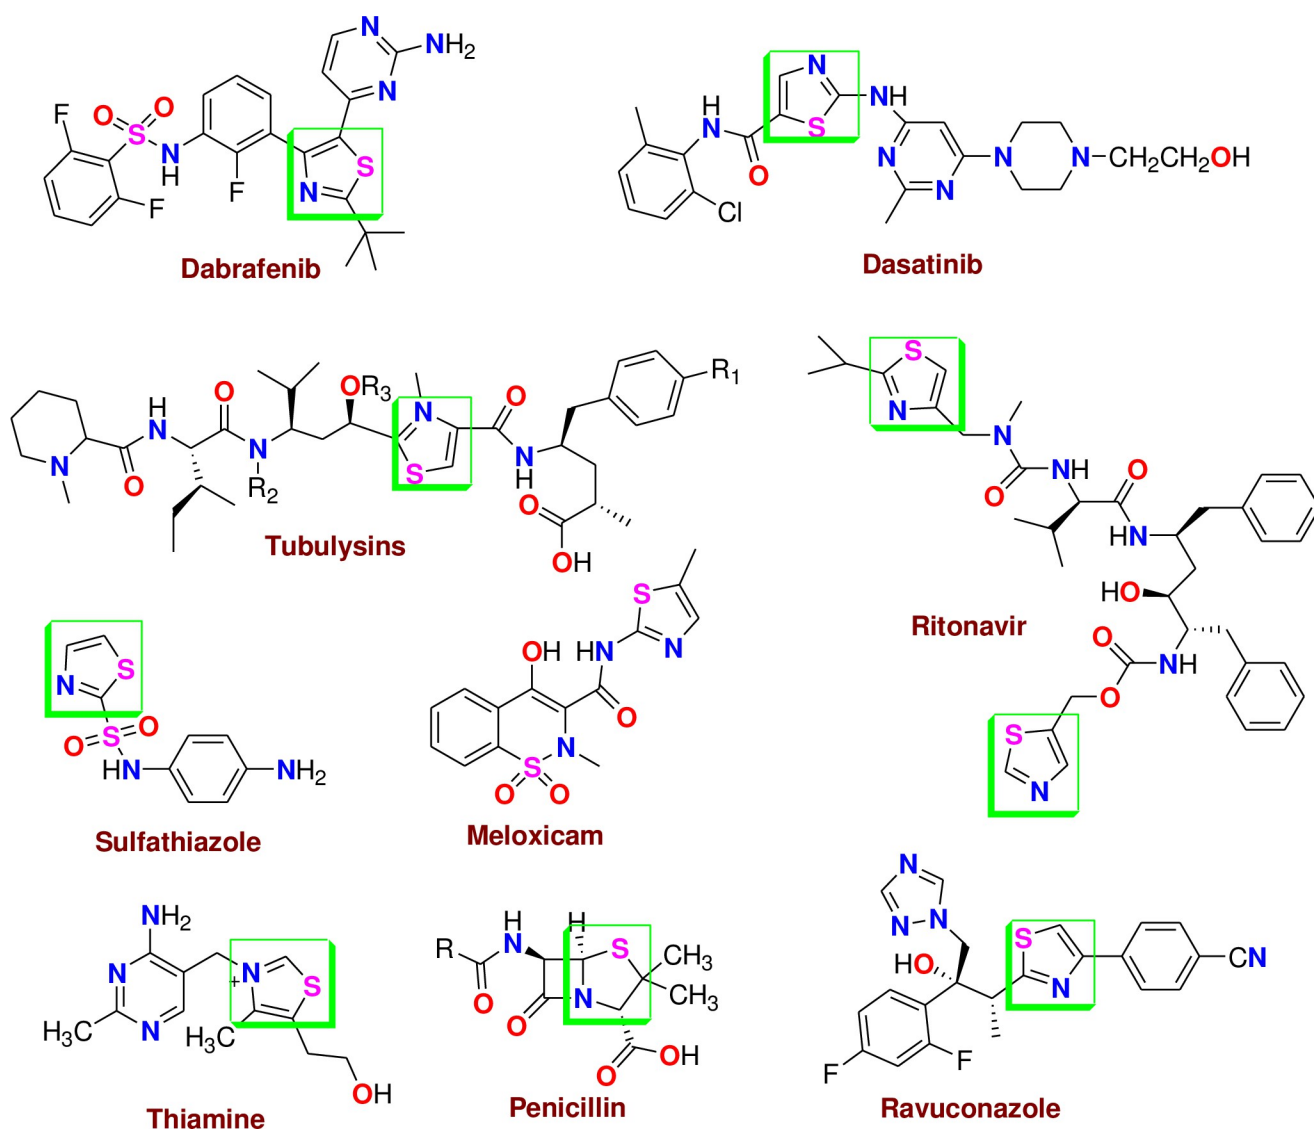

Fig 1. The natural compounds and marketing drugs containing thiazole moiety.

<https://doi.org/10.1371/journal.pone.0274459.g001>

focused on synthesizing a new series of thiazole and formazan derivatives and then investigating their anti-gastric and anti-colon cancer activities.

Furthermore, several previous studies of compounds containing thiazole moiety proved the effectiveness of these compounds as anticancer drugs [36–40]. The scenario of cancer is one of the most important in medicinal chemistry, while thiazoles are very important in treating cancers. It was reported the importance of the thiazole ring as a scaffold present in a wide range of therapeutic agents, the medicinal chemists have been encouraged to synthesize a large number of novel antitumors bearing this heterocycle, which furnish extensive synthetic possibilities due to the presence of several reaction sites [41–45].

By the way, the insilico-studies gave a chance to check the activities of these compounds, molecular docking studies with MOE and pharmacokinetics studies by molinspiration are good ways to discover and confirm the biological activities of the compounds under investigation [46–48].

## 2. Experimental

### 2.1. Chemistry

Instruments (See [S1 File](#))

### 2.2. Synthesis of 2-(5-Bromo-2,3-dihydro-1H-inden-1-ylidene)hydrazine-1-carbothioamide (3)

In a 50 mL round Q.F. flask, we added 0.01 mole of 5-Bromo-indan-1-one **1** (2.11 g) with the same number of moles of thiosemicarbazide **2** ( $\approx 1$ g) in absolute ethanol (30 mL). The mixture was heated under reflux to dissolve the thiosemicarbazide; then, 1 mL of concentrated HCl was added, and the reflux was completed to 2 h. The solid thiosemicarbazone **3** was filtered after the solution cold and crystallized from ethanol/dioxane to afford compound **3** as pale yellow, yield: 93%; M.p: 227–230°C; IR: 3430, 3366, 3147 (NH<sub>2</sub>, NH), 2917 (sp<sup>3</sup>-CH), 1593 (C = N), 1464, 1289, 1171 cm<sup>-1</sup>. <sup>1</sup>H NMR (850 MHz, CDCl<sub>3</sub>): 2.84 (d, J = 8.5 Hz, 2H, CH<sub>2</sub>), 3.15–3.20 (m, 2H, CH<sub>2</sub>), 6.44 (s, 1H, NH), 7.33 (s, 1H, NH), 7.44 (d, J = 8.5 Hz, 1H, ArH), 7.54 (s, 1H, ArH), 7.74 (d, J = 8.5 Hz, 1H, ArH), 8.69 (s, 1H, NH). <sup>13</sup>C NMR (CDCl<sub>3</sub>): 26.7 (CH<sub>2</sub>), 28.3 (CH<sub>2</sub>), 122.9, 125.7, 128.9, 130.8, 135.8, 150.4, 156.5, 178.7 (C = S). MS(m/z): 285 (M<sup>+</sup> + 2, 29), 284 (M<sup>+</sup> + 1, 6), 283 (M<sup>+</sup>, 27), 268 (15), 266 (14), 129 (10), 115 (67), 102 (31), 90 (8), 89 (42), 76 (39), 60 (100). Elemental Analysis (%): (C<sub>10</sub>H<sub>10</sub>BrN<sub>3</sub>S; Mwt: 284.18) Calc. (Found): C, 42.27 (42.18); H, 3.55 (3.45); N, 14.79 (14.59)%.

### 2.3. Synthesis of (5-Bromo-indan-1-ylidene)-hydrazine (4)

In a 25 mL round Q.F. flask, we added 0.005 moles of 5-Bromo-indan-1-one **1** (1.06 g) in 20 mL EtOH and 1 mL of NH<sub>2</sub>NH<sub>2</sub>·H<sub>2</sub>O were added, followed by refluxing the whole mixture for 5h. After the reaction (TLC mentoring), the pale-yellow solid was collected and washed with methanol to afford pale yellow crystals, yielding 78%; M.p: 120°C. IR: 3344, 3250 (NH<sub>2</sub>), 2918 (sp<sup>3</sup>-CH), 1469, 1351, 1286, 1169, 1107, 1055 cm<sup>-1</sup>. <sup>1</sup>H NMR (850 MHz, CDCl<sub>3</sub>): 2.8–2.7 (m, 2H, CH<sub>2</sub>), 3.0–3.11 (m, 2H, CH<sub>2</sub>), 5.20 (s, 2H, NH<sub>2</sub>), 7.37 (d, J = 8.5 Hz, 1H, ArH), 7.45 (s, 1H, ArH), 7.5 (d, J = 8.5 Hz, 1H, ArH). <sup>13</sup>C NMR (CDCl<sub>3</sub>): 24.9 (CH<sub>2</sub>), 28.1 (CH<sub>2</sub>), 122.0, 123.1, 128.5, 130.3, 137.7, 148.6, 155.5. MS(m/z): 225 (M<sup>+</sup>, 2), 208 (13), 143 (7), 129 (37), 115 (100), 113 (10), 102 (40), 89 (20), 83 (14), 77 (15), 75 (17), 71 (20), 63 (24), 57 (32), 55 (27). Elemental Analysis (%): (C<sub>9</sub>H<sub>9</sub>BrN<sub>2</sub>; Mwt: 225.09) Calc. (Found): C, 48.02 (47.91); H, 4.03 (4.10); N, 12.45 (12.32)%.

**The reaction of 2-(5-Bromo-2,3-dihydro-1H-inden-1-ylidene)hydrazine-1-carbothioamide (3) or (5-Bromo-indan-1-ylidene)-hydrazine (4) with hydrazonoyl chlorides 5 or 13 or 13 and phenacyl bromide derivatives 9**

The method for synthesis of derivatives **6a-e**, **10a-d**, **14a, b**, **15**, and **16** as illustrated in Fig 2.

**2-(2-(5-Bromo-2,3-dihydro-1H-inden-1-ylidene)hydrazineyl)-4-methyl-5-(phenyldiazenyl)-thiazole (6a)**

Orange solid, Yield: 88%; M.p: 220–222°C; IR: 3113 (NH), 3036 (sp<sup>2</sup>-CH), 2918 (sp<sup>3</sup>-CH), 1615 (C = N), 1546, 1410, 1378, 1252, 1169, 1117 cm<sup>-1</sup>. <sup>1</sup>H NMR (850 MHz, CDCl<sub>3</sub>) 2.69 (s, 3H, CH<sub>3</sub>), 3.12–3.21 (m, 4H, 2CH<sub>2</sub>), 7.06 (t, J = 7.65 Hz, 1H, ArH), 7.23 (d, J = 8.5 Hz, 2H, ArH), 7.37 (t, J = 6.8 Hz, 2H, ArH), 7.44 (s, 1H, ArH), 7.48 (d, J = 7.65 Hz, 1H, ArH), 7.57 (s, 1H, NH), 7.82 (d, J = 7.65 Hz, 1H, ArH). MS(m/z): 427 (M<sup>+</sup> + 1, 29), 426 (M<sup>+</sup>, 11), 425 (29), 285 (4), 129 (27), 115 (71), 112 (10), 102 (24), 92 (19), 77 (100), 65 (29). Elemental Analysis (%): (C<sub>19</sub>H<sub>16</sub>BrN<sub>5</sub>S; Mwt: 426.34) Calc. (Found): C, 53.53 (53.29); H, 3.78 (3.69); N, 16.43 (16.37)%.

**2-(2-(5-Bromo-2,3-dihydro-1H-inden-1-ylidene)hydrazineyl)-4-methyl-5-(m-tolyldiazenyl)-thiazole (6b)**

Green solid, Yield: 85%; M.p: 128–129°C; IR: 3400 (NH), 3048 (sp<sup>2</sup>-CH), 2918 (sp<sup>3</sup>-CH), 1595 (C = N), 1506, 1266, 1189, 1057 cm<sup>-1</sup>. <sup>1</sup>H NMR(850 MHz, CDCl<sub>3</sub>): 2.36 (s, 3H, CH<sub>3</sub>), 2.39 (s, 3H, CH<sub>3</sub>), 2.66–3.16 (m, 4H, 2CH<sub>2</sub>), 6.87–7.57 (m, 7H, ArH), 7.62 (s, 1H, NH). <sup>13</sup>C NMR (CDCl<sub>3</sub>): 18.4 (CH<sub>3</sub>), 21.5 (CH<sub>3</sub>), 28.4 (CH<sub>2</sub>), 29.6 (CH<sub>2</sub>), 111.4, 114.7, 124.1, 124.9, 129.0, 129.3, 130.0, 130.5, 130.9, 134.1, 139.5, 143.2, 156.7, 170.0, 174.1, 177.5. MS(m/z): 440

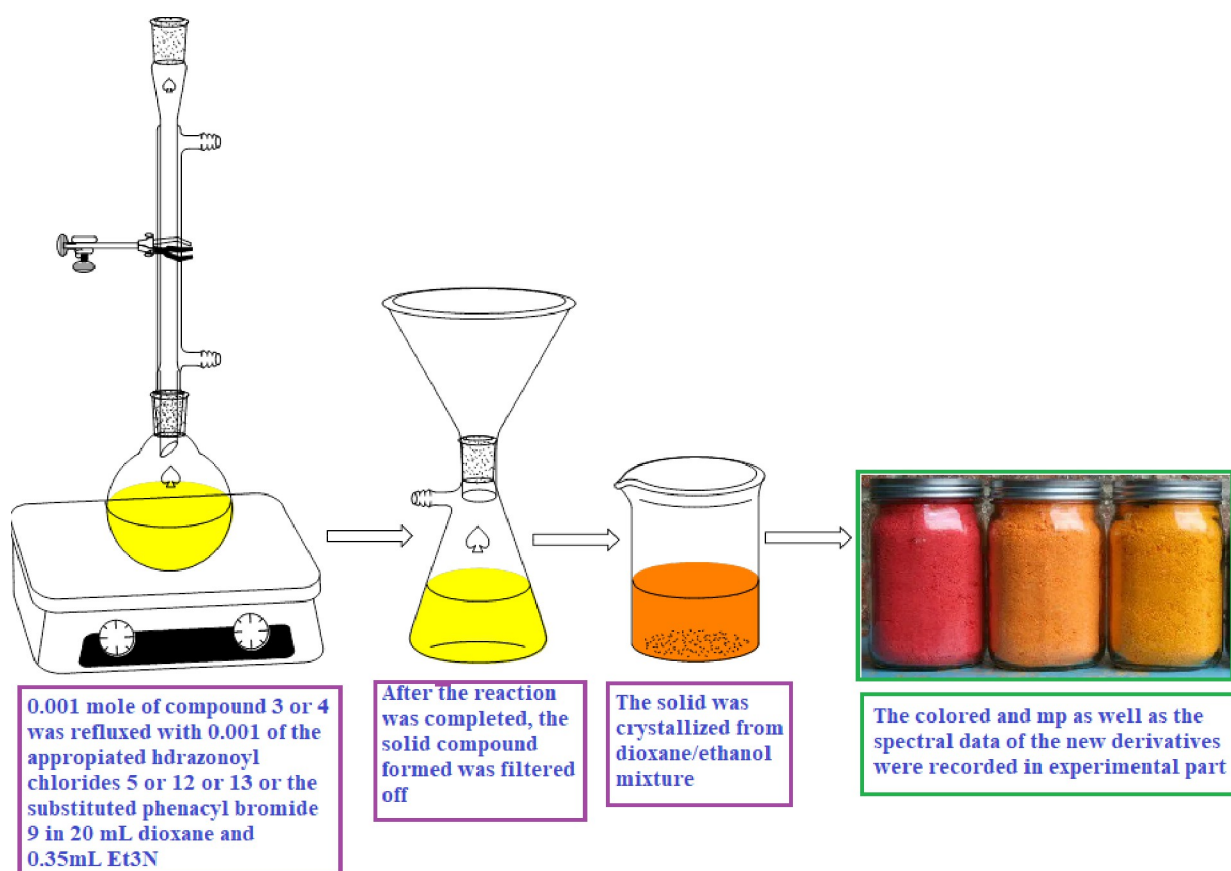

**Fig 2.** The method for synthesis of derivatives **6a-e**, **10a-d**, **14a, b**, **15** and **16**.

<https://doi.org/10.1371/journal.pone.0274459.g002>

( $M^+$ , 3), 439 (5), 129 (19), 115 (53), 106 (18), 102 (20), 91 (100), 78 (10), 77 (27), 65 (24), 51 (7). Elemental Analysis (%): ( $C_{20}H_{18}BrN_5S$ ; Mwt 440.36) Calc. (Found): C, 54.55 (54.36); H, 4.12 (4.04); N, 15.90 (15.82)%.

**2-(2-(5-Bromo-2,3-dihydro-1H-inden-1-ylidene)hydrazineyl)-4-methyl-5-(p-tolyldiazenyl)thiazole (6c)**

Orange solid, Yield: 87%; M.p: 130–132°C; IR: 3213 (NH), 3181 ( $sp^2$ -CH), 2917 ( $sp^3$ -CH), 1612 (C = N), 1500, 1281, 1171, 1117  $cm^{-1}$ .  $^1H$  NMR(850 MHz,  $CDCl_3$ ): 2.35 (s, 3H,  $CH_3$ ), 2.39 (s, 3H,  $CH_3$ ), 2.67–3.19 (m, 4H, 2CH<sub>2</sub>), 7.12–7.48 (m, 6H, ArH), 7.56 (s, 1H, NH), 7.81 (d,  $J$  = 8.5Hz, 1H, ArH).  $^{13}C$  NMR ( $CDCl_3$ ): 16.7 ( $CH_3$ ), 22.7 ( $CH_3$ ), 28.5 ( $CH_2$ ), 29.7 ( $CH_2$ ), 114.1, 124.1, 126.5, 128.1, 129.0, 130.0, 132.6, 136.7, 140.2, 152.7, 174.1, 177.4, (two carbons overlapped). MS(m/z): 440 ( $M^+$ , 3), 135 (5), 129 (22), 115 (58), 106 (18), 102 (20), 91 (100), 77(26), 65 (20), 51 (8). Elemental Analysis (%): ( $C_{20}H_{18}BrN_5S$ ; Mwt: 440.36) Calc. (Found): C, 54.55 (54.42); H, 4.12 (4.10); N, 15.90 (15.79)%.

**2-(2-(5-Bromo-2,3-dihydro-1H-inden-1-ylidene)hydrazineyl)-5-((3-chlorophenyl)-diazenyl)-4-methylthiazole (6d)**

Red solid, Yield: 89%; M.p: 180°C; IR: 3400 (br. NH), 1600 (C = N), 1508, 1468, 1374, 1242, 1173, 1081.  $^1H$  NMR (DMSO- $d_6$ ) 2.56 (s, 3H,  $CH_3$ ), 3.02–3.09 (m, 4H, 2CH<sub>2</sub>), 6.99–7.62 (m, 7H, ArH), 7.64 (s, 1H, NH).  $^{13}C$  NMR (DMSO- $d_6$ ): 16.9 ( $CH_3$ ), 28.5 ( $CH_2$ ), 29.5 ( $CH_2$ ), 114.1, 123.9, 122.0, 123.9, 125.0, 126.1, 129.6, 130.5, 130.9, 131.0, 131.3, 134.3, 136.4, 136.8, 153.6, 158.0. MS(m/z): 461 ( $M^+$ +2, 4), 460 ( $M^+$ +1, 2), 459 ( $M^+$ , 3), 183 (5), 139 (6), 129 (34), 115 (100), 111 (92), 102 (37), 99 (29), 95 (5), 89 (20), 77 (14), 75 (36), 67 (37), 63 (27), 57 (7), 55 (7), 51 (11). Elemental Analysis (%): ( $C_{19}H_{15}BrClN_5S$ ; Mwt: 460.78) Calc. (Found): C, 49.53 (49.48); H, 3.28 (3.19); N, 15.20 (15.08)%.

**2-(2-(5-Bromo-2,3-dihydro-1H-inden-1-ylidene)hydrazineyl)-5-((4-chlorophenyl)diazenyl)-4-methylthiazole (6e)**

Red solid, Yield: 83%; M.p: 177–178°C; IR: 3305 (NH), 3174 ( $sp^2$ -CH), 2919 ( $sp^3$ -CH), 1598 (C = N), 1487, 1299, 1169, 1024  $cm^{-1}$ .  $^1H$  NMR(850 MHz,  $CDCl_3$ ): 1.26–1.36 (m, 2H, CH<sub>2</sub>), 2.68(s, 3H,  $CH_3$ ), 3.13–3.20 (m, 2H, CH<sub>2</sub>), 7.16 (d,  $J$  = 8.5 Hz, 2H, ArH), 7.32 (d,  $J$  = 8.5Hz, 1H, ArH), 7.40 (s, 1H, ArH), 7.47 (d,  $J$  = 8.5 Hz, 2H, ArH), 7.57 (s, 1H, NH), 7.80 (d,  $J$  = 8.5Hz, 1H, ArH).  $^{13}C$  NMR ( $CDCl_3$ ): 16.7 ( $CH_3$ ), 27.7 ( $CH_2$ ), 28.5( $CH_2$ ), 115.2, 124.1, 126.7, 127.7, 129.0, 129.5, 130.6, 136.6, 141.2, 141.6, 152.8, 169.5, 174.6, 177.5. MS(m/z): 460 ( $M^+$ , 1), 459 (2), 210 (3), 141 (5), 129 (34), 115 (96), 111 (100), 102 (38), 99 (29), 89 (19), 77 (11), 75 (33), 71 (14), 67 (32), 63(22), 51(9). Elemental Analysis (%): ( $C_{19}H_{15}BrClN_5S$ ; Mwt: 460.78). Calc C, 49.53; H, 3.28; Br, 17.34; Cl, 7.69; N, 15.20; S, 6.96.

**N-(5-Bromo-indan-1-ylidene)-N'-(4-phenyl-thiazol-2-yl)-hydrazine (10a)**

Gray solid, Yield: 89%; M.p: 247–248°C; IR: 3400 (NH), 3052 ( $sp^2$ -CH), 1616 (C = N), 1512, 1435, 1370, 1208, 1117, 1016  $cm^{-1}$ .  $^1H$  NMR (850 MHz, DMSO- $d_6$ ): 2.88 (Br.s, 2H,CH<sub>2</sub>), 3.09 (Br.s, 2H,CH<sub>2</sub>), 7.32 (s, 1H, thiazole-H), 7.39–7.53 (m, 7H, ArH), 7.60 (s, 1H, NH), 7.88 (d,  $J$  = 8.5Hz, 1H, ArH).  $^{13}C$  NMR (DMSO- $d_6$ ): 28.2 ( $CH_2$ ), 28.5 ( $CH_2$ ), 108.1, 122.8, 123.8, 126.0, 128.0, 128.6, 128.8, 129.2, 130.6, 133.4, 137.3, 150.9, 156.3, 165.8. MS(m/z): 384 ( $M^+$ , 12), 383 (24), 210 (4), 176 (45), 148 (9), 134 (100), 121 (12), 115 (24), 102 (30), 89 (17), 77 (20), 63 (8), 51 (9). Elemental Analysis (%): ( $C_{18}H_{14}BrN_3S$ ; Mwt: 384.30). Calc. (Found) C, 56.26 (56.09); H, 3.67 (3.56); N, 10.93 (10.84)%.

**N-(5-Bromo-indan-1-ylidene)-N'-(4-p-tolyl-thiazol-2-yl)-hydrazine (10b)**

Gray solid, Yield: 90%; M.p: 233–234°C; IR: 3200 (NH), 3065 ( $sp^2$ -CH), 2917 ( $sp^3$ -CH), 1613 (C = N), 1508, 1468, 1205, 1172, 1060, 1016  $cm^{-1}$ .  $^1H$  NMR (850 MHz, DMSO- $d_6$ ): 2.32 (s, 3H,  $CH_3$ ), 2.89–3.11 (m, 4H, 2CH<sub>2</sub>), 7.22–7.77 (m, 9H, ArH, thiazole-H and NH).  $^{13}C$  NMR (DMSO- $d_6$ ): 21.2 ( $CH_3$ ), 28.0 ( $CH_2$ ), 28.5 ( $CH_2$ ), 103.4, 122.7, 123.5, 125.9, 128.0, 129.1, 129.4 129.6, 130.6, 130.7, 137.3, 137.6, 150.7, 169.6. Mass (m/z): 400 ( $M^+$  +2, 22), 398 ( $M^+$ , 44),



190(51), 162(10), 148(100), 129(29), 115(52), 102(39), 89(20), 75(10). MS(m/z): 399( $M^+ + 2$ , 88), 397 ( $M^+ + 1$ , 87), 339 ( $M^+$ , 4), 289(5), 190(51), 174(9), 162(10), 148(100), 135(10), 129(29), 115(53), 102(38), 91(25), 77(18), 63(15), 51(11). Elemental Analysis (%): ( $C_{19}H_{16}BrN_3S$ ; Mwt: 398.32). Calc. (Found): C, 57.29 (57.16); H, 4.05 (3.93); N, 10.55 (10.43)%.

**N-(5-Bromo-indan-1-ylidene)-N'-[4-(4-bromo-phenyl)-thiazol-2-yl]-hydrazine (10c)**

Gray solid, Yield: 91%; M.p: 230–232°C; IR: 3200 (NH), 3048 ( $sp^2$ -CH), 2919 ( $sp^3$ -CH), 1610 (C = N), 1491, 1368, 1205, 1104, 1001, 824  $cm^{-1}$ .  $^1H$  NMR (850 MHz, DMSO- $d_6$ ): 2.88 (t,  $J = 8.5$  Hz, 2H,  $CH_2$ ), 3.10 (t,  $J = 8.5$  Hz, 2H,  $CH_2$ ), 7.41 (s, 1H, thiazole-H) 7.5–7.83 (m, 8H, Ar-H and NH).  $^{13}C$  NMR (DMSO- $d_6$ ): 28.0 ( $CH_2$ ), 28.4 ( $CH_2$ ), 105.2, 120.9, 122.7, 123.5, 128.0, 129.1, 130.6, 132.0, 134.4, 137.6, 150.7, 155.3, 169.9. MS(m/z): 463 ( $M^+$ , 25), 461 (15), 256 (50), 210 (17), 182 (5), 174 (100), 155 (5), 146 (25), 133 (17), 129 (74), 120 (25), 115 (79), 102 (87), 95 (5), 89 (44), 75 (32), 63 (22), 57 (10), 51 (20). Elemental Analysis (%): ( $C_{18}H_{13}Br_2N_3S$ ; Mwt: 463.19). Calc. (Found): C, 46.68 (46.52); H, 2.83 (2.78); N, 9.07 (9.01)%.

**N-(5-Bromo-indan-1-ylidene)-N'-[4-(4-chloro-phenyl)-thiazol-2-yl]-hydrazine (10d)**

Gray solid, Yield: 88%; M.p: 255–256°C; IR: 3250 (NH), 3050 ( $sp^2$  CH), 2922 ( $sp^3$  CH), 1616 (C = N), 1491, 1371, 1272, 1208, 1172, 1094, 1010  $cm^{-1}$ .  $^1H$  NMR (850 MHz, DMSO- $d_6$ ): 2.88 (t,  $J = 8.5$  Hz, 2H,  $CH_2$ ), 3.08 (t,  $J = 8.5$  Hz, 2H,  $CH_2$ ), 7.39 (s, 1H, thiazole-H), 7.46 (t,  $J = 8.5$  Hz, 2H, ArH), 7.52–7.55 (m, 3H, ArH), 7.60 (s, 1H, NH), 7.88–7.91 (m, 2H, ArH).  $^{13}C$  NMR (DMSO- $d_6$ ): 28.0 ( $CH_2$ ), 28.4 ( $CH_2$ ), 105.1, 122.8, 123.5, 127.7, 129.0, 129.1, 130.6, 132.3, 137.5, 150.7, 155.4, 156.5, 165.9, 169.9. MS(m/z): 419 ( $M^+ + 2$ , 100), 418 ( $M^+ + 1$ , 43), 417 ( $M^+$ , 76), 210 (67), 174 (21), 168 (19), 146 (5), 136(5), 129 (30), 115 (42), 111 (12), 102 (59), 89 (25), 75 (21), 63 (10), 51 (5). Elemental Analysis (%): ( $C_{18}H_{13}BrClN_3S$ ; Mwt: 418.74). Calc. (Found) C, 51.63 (51.54); H, 3.13 (3.08); N, 10.03 (9.98)%.

**N'-(5-bromo-2,3-dihydro-1H-inden-1-ylidene)-2-oxo-N''-phenylpropanehydrazonhydrazide (Formazan, 14a)**

Yellow solid, Yield: 89%; M.p: 190°C; IR: 3294, 3205 (2NH), 3025 ( $sp^2$  CH), 1667 (C = O), 1600 (C = N), 1485, 1247, 1148  $cm^{-1}$ .  $^1H$  NMR(850 MHz,  $CDCl_3$ ): 2.56 (s, 3H,  $CH_3$ ), 2.78 (t,  $J = 8.5$  Hz, 2H,  $CH_2$ ), 3.16 (t,  $J = 8.5$  Hz, 2H,  $CH_2$ ), 6.93 (t,  $J = 8.5$  Hz, 1H, ArH), 7.17 (d,  $J = 8.5$  Hz, 2H, ArH), 7.33 (t,  $J = 8.5$  Hz, 2H, ArH), 7.45–7.50 (m, 3H, ArH), 8.47 (s, 1H, NH), 11.62 (s, 1H, NH). MS(m/z): 384 ( $M^+$ , 3), 212 (5), 210 (8), 176 (14), 115 (26), 105 (34), 102 (17), 92 (25), 77 (100), 70 (12), 65 (30). Elemental Analysis (%): ( $C_{18}H_{17}BrN_4O$ ; Mwt: 385.27). Calc. (Found) C, 56.12 (56.03); H, 4.45 (4.31); N, 14.54 (14.42)%.

**N'-(5-bromo-2,3-dihydro-1H-inden-1-ylidene)-N''-(4-chlorophenyl)-2-oxopropanehydrazon-hydrazide (Formazan, 14b)**

Yellow solid, Yield: 87%; M.p: 197–198°C; IR: 3331, 3318 (2NH), 1670(C = O), 1596 (C = N), 1361, 1243, 1159  $cm^{-1}$ .  $^1H$  NMR(850 MHz,  $CDCl_3$ ): 2.56 (s, 3H,  $CH_3$ ), 2.83 (t,  $J = 8.5$  Hz, 2H,  $CH_2$ ), 3.19 (t,  $J = 8.5$  Hz, 2H,  $CH_2$ ), 7.10 (d,  $J = 8.5$  Hz, 2H, ArH), 7.3 (s, 1H, ArH), 7.45–7.53 (m, 4H, ArH), 8.50 (s, 1H, NH), 11.67 (s, 1H, NH).  $^{13}C$  NMR ( $CDCl_3$ ): 23.5 ( $CH_3$ ), 25.1( $CH_2$ ), 28.2( $CH_2$ ), 114.1, 121.5, 124.2, 125.1, 128.9, 129.3, 130.7, 132.2, 136.4, 142.6, 149.2, 152.6, 192.9 (C = O). MS(m/z): 420 ( $M^+ + 1$ , 3), 419 ( $M^+$ , 4), 210 (76), 166 (8), 141 (63), 129 (45), 115 (59), 111 (100), 99 (45), 89 (16), 75 (40), 70 (27), 63 (23), 51 (10). Elemental Analysis (%): ( $C_{18}H_{16}BrClN_4O$ ; Mwt: 419.71). Calc. (Found) C, 51.51 (51.42); H, 3.84 (3.75); N, 13.35 (13.29)%.

**Ethyl 2-(2-(5-bromo-2,3-dihydro-1H-inden-1-ylidene)hydrazineyl)-2-(2-phenyl-hydrazineylidene)acetate (Formazan, 15)**

Red solid, Yield: 87%; M.p: 174–176°C IR: 3329, 3252 (2NH), 3050 ( $sp^2$  CH), 2984 ( $sp^3$  CH), 1693 (C = O), 1602 (C = N), 1489, 1370, 1247, 1165  $cm^{-1}$ .  $^1H$  NMR(850 MHz,  $CDCl_3$ ): 1.44 (t,  $J = 8.5$  Hz, 3H,  $CH_3$ ), 2.78 (t,  $J = 8.5$  Hz, 2H,  $CH_2$ ), 3.17 (t,  $J = 8.5$  Hz, 2H,  $CH_2$ ), 4.36 (q,  $J = 8.5$  Hz, 2H,  $CH_2$ ), 6.89 (t,  $J = 8.5$  Hz, 1H, ArH), 7.15 (d,  $J = 8.5$  Hz, 2H, ArH), 7.30 (t,

$J = 8.5\text{Hz}$ , 2H, ArH), 7.48 (d,  $J = 8.5\text{Hz}$ , 2H, ArH), 7.50 (s, 1H, ArH), 8.37 (s, 1H, NH), 11.46 (s, 1H, NH).  $^{13}\text{C}$  NMR ( $\text{CDCl}_3$ ): 14.2 ( $\text{CH}_3$ ), 25.0 ( $\text{CH}_2$ ), 28.2 ( $\text{CH}_2$ ), 62.3 ( $\text{CH}_2$ ), 112.9, 120.1, 121.6, 124.1, 124.6, 128.9, 129.2, 130.7, 136.4, 144.2, 149.1, 152.1, 162.6 ( $\text{C} = \text{O}$ ). MS( $m/z$ ): 416 ( $\text{M}^+ + 2$ , 5), 415 ( $\text{M}^+ + 1$ , 5), 414 ( $\text{M}^+$ , 7), 206 (5), 129 (11), 115 (21), 105 (30), 92 (17), 89 (5), 77 (100), 65 (20), 51 (9). Elemental Analysis (%): ( $\text{C}_{19}\text{H}_{19}\text{BrN}_4\text{O}_2$ ; Mwt: 415.29). Calc. (Found): C, 54.95 (54.81); H, 4.61 (4.53); N, 13.49 (13.29)%.

**2-(2-(5-Bromo-2,3-dihydro-1H-inden-1-ylidene)hydrazineyl)-N-phenyl-2-(2-phenyl-hydrazineylidene)acetamide (Formazan, 16)**

Yellow solid, Yield: 82%; M.p: 230–232 °C IR: 3356, 3326, 3247 (3NH), 3052 ( $\text{sp}^2$  CH), 1662 ( $\text{C} = \text{O}$ ), 1602 ( $\text{C} = \text{N}$ ), 1539, 1488, 1444, 1226, 1168  $\text{cm}^{-1}$ .  $^1\text{H}$  NMR(850 MHz,  $\text{CDCl}_3$ ): 2.83 (m, 2H,  $\text{CH}_2$ ), 3.19 (t,  $J = 8.5\text{Hz}$ , 2H,  $\text{CH}_2$ ), 6.92–7.66 (m, 13H, ArH), 8.81 (s, 1H, NH), 9.13 (s, 1H, NH), 11.30 (s, 1H, NH).  $^{13}\text{C}$  NMR ( $\text{CDCl}_3$ ): 28.3 ( $\text{CH}_2$ ), 29.7 ( $\text{CH}_2$ ), 112.5, 119.5, 119.9, 121.6, 124.2, 124.4, 128.9, 129.1, 129.4, 130.7, 136.4, 137.2, 144.2, 149.3, 153.1, 159.1 ( $\text{C} = \text{O}$ ). MS( $m/z$ ): 463 ( $\text{M}^+ + 2$ , 1), 462 ( $\text{M}^+ + 1$ , 1), 461 ( $\text{M}^+$ , 1), 147 (7), 129 (9), 120 (24), 115 (14), 107 (23), 102 (10), 92 (31), 77 (100), 65 (23), 51 (12). Elemental Analysis (%): ( $\text{C}_{23}\text{H}_{20}\text{BrN}_5\text{O}$ ; Mwt: 462.35). Calc. (Found): C, 59.75 (59.63); H, 4.36 (4.29); N, 15.15 (15.05)%.

## 2.4. Biological studies

**Anticancer screening.** *A- Cell culture.* The cells were obtained from the Egyptian Holding Company for Biological Products & Vaccines (VACSERA), Giza, Egypt, then maintained in the tissue culture unit. The cells were grown in RBMI-1640 medium, supplemented with 10% heat-inactivated FBS, 50 units/mL of penicillin, and 50 mg/mL of streptomycin, and maintained at 23 in a humidified atmosphere containing 5%  $\text{CO}_2$ . The cells were maintained as monolayer culture by serial sub-culturing. Cell culture reagents were obtained from Lonza (Basel, Switzerland). The anticancer activity of the rested compounds was evaluated against Gastric (SNU-16) Patch number (ATCC CRL-5822) (Gastric cancer) and COLO205 cells (colon cancer) [47, 49].

**The sulforhodamine B (SRB) cytotoxicity assay.** Sulforhodamine B(SRB) assay method was used to evaluate cytotoxicity [50, 51]. Exponentially growing cells were collected using 0.25% Trypsin-EDTA seeded in 96-well plates at 1000–2000 cells/well in RBMI-1640 supplemented medium. After 24 h, cells were incubated for 72 h with various concentrations of the tested compounds. Following 72 h treatments, the cells would be fixed with 10% trichloroacetic acid for 1 h at 4 °C. Wells were stained for 10 minutes at room temperature with 0.4% SRBC (Sulphorhodamine B) dissolved in 1% acetic acid. After that, the plates were air-dried for 24 h. At the same time, the dye was dissolved in Tris-HCl and left for 5 min on the shaker at 1600 rpm. Each well's optical density (OD) was measured spectrophotometrically at 564 nm; by using an ELISA microplate reader (ChroMate-4300, FL, USA). The  $\text{IC}_{50}$  values were calculated according to the equation for Boltzman sigmoidal concentration-response curve using the nonlinear regression fitting models (Graph Pad, Prism Version 9).

## 2.5. In-Silico ADME study

**A-Molecular docking.** The docking analyses were characterized by the Molecular Environment (MOE) software. Chemdraw compound preparation, Chem 3d structures, Chem 3D 16 (Molecular Modeling and Analysis; Cambridge Soft Corporation) software, to dock the complexes toward the Colon cancer (PDB = 2A4L), Gastric cancer (PDB = PDB = 2BID). The crystal structure was downloaded from the PDB at [www.rcsb.org](http://www.rcsb.org). The following procedure was applied the water molecules, co-ligand, and metal ions were removed, and the final form was obtained after 3D protonation and the correction process. The MOE site finder generated

the active binding sites to create the dummy sites as the binding pocket. The default docking parameters were triangle matcher for replacing the molecule and London dG for rescoring the docking scores. The higher negative values of the docking scores were presented along with 2D and 3D structures [52–54].

**B-Pharmacophore and ADME studies.** A computational study of indane derivatives based on the thiazole nucleus was performed to predict ADME properties by the QikProp3.2 tool available in Schrödinger 9.0 version (USA) and Molinspiration online property calculation toolkit to get an idea of whether the compound has optimum pharmacokinetic properties to enter higher phases of the drug development process or not. Molinspiration strategy may be described as a complex balance of various molecular properties and structural features which conclude whether the appropriate molecule is related to the known drugs [55, 56].

## 2.6. Assessment of the safety profile

The ProTox-II software predicts different toxicity endpoints, such as acute toxicity, hepatotoxicity, carcinogenicity, and mutagenicity [50, 56]. The Pred-hERG (human Ether-a-go-go-Related Gene) software was used to assess cardiotoxicity. It depends on statistically significant and externally predictive quantitative structure-activity relationship (QSAR) models of hERG blockage closely associated with severe and potentially fatal cardiac dysrhythmia. The SDF (structure data file) and SMILES (simplified molecular-input line-entry system) strings were used throughout the generation process [45].

## 3. Results and discussion

### 3.1 Chemistry

This research article synthesized the targeted two starting compounds, thiosemicarbazone, and hydrazone of 5-Bromo-indan-1-one **1** and **2**, as indicated in Scheme 1 from the condensation reaction **1** with each of thiosemicarbazone **2** and hydrazine hydrate in refluxing acidified ethanol or pure ethanol, respectively. The structure of derivatives **3** and **4** were confirmed based on their  $^1\text{H}$  NMR, IR, Mass, and EA (elemental analysis) data. For instance, the  $^1\text{H}$  NMR spectrum of derivatives **3** revealed all expected signals as follows:  $\delta = 2.84, 3.15$  (two  $\text{CH}_2$ ),  $6.44, 7.33, 8.69$  (three NH), and  $7.44\text{--}7.74$  (three  $\text{H}_{\text{Ar}}$ ) ppm. The appearance of three NH singlet signals in  $^1\text{H}$  NMR of **3** is attributed to the two protons of the amino group being non-equivalent as one NH contributed to the H-bond with the  $\text{C}=\text{N}$  group. In addition,  $^{13}\text{C}$

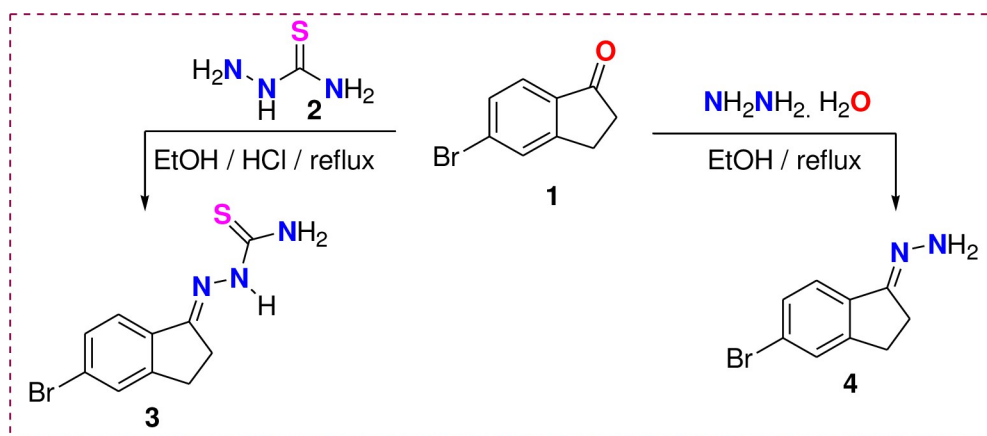

Scheme 1. Synthesis of compounds **3** and **4**.

<https://doi.org/10.1371/journal.pone.0274459.g003>



NMR of the same compound **3** showed ten carbon signals at  $\delta = 26.7$  ( $\text{CH}_2$ ), 28.3 ( $\text{CH}_2$ ), 122.9, 125.7, 128.9, 130.8, 135.8, 150.4, 156.5 and 178.7 ( $\text{C} = \text{S}$ ) ppm.

To synthesize a new series of thiazole rings combined with indene, we subjected the thiosemicarbazone derivative **3** to react with hydrazonoyl chloride **5a-e** in dioxane/ $\text{Et}_3\text{N}$  under reflux (Scheme 2). Such reaction products can be found in one of the three tautomeric forms 6–8. Based on the wavelength ( $\lambda_{\text{max}}$ ) of the product in dioxane revealed for all derivatives, three absorption bands at 458–431, 331–323, and 259–241 nm (Table 1 & Fig 3). The appearance of  $\lambda_{\text{max}}$  at 458–431nm excluded the hydrazone tautomer **8** and proved the existence of one of the two azo-form **6** or **7** [32]. Double irradiation of the  $\text{CH}_3$  group of thiazole derivative **6a** or **7a** at  $\delta = 2.69$  ppm in the NOE difference experiment revealed no enhancement for the NH signal, which means there is no electronic interaction between the protons of  $\text{CH}_3$  and NH groups [57]. This result confirmed the tautomeric form **6** rather than structure **7**. Recording the electronic absorption of the unsubstituted thiazole derivative **6a** in different solvents with different polarities (Table 1), we noted no change in the absorption bands in three solvents (ethanol, acetone, and acetonitrile). Still, there is a strong bathochromic shift in the case of DMF and DMSO. This shift indicated the derivative **6a** in two tautomers, **6a** and **7a**, in the high dielectric solvents DMF and DMSO.

Similarly, phenacyl bromide derivatives **9a-d** were reacted with thiosemicarbazone derivative **3** to afford the thiazole derivatives **10** or **11**, as illustrated in Scheme 3. However, spectral analysis data proved the isolated product's structure as **10** rather than **11**. This conclusion was observed from the  $^1\text{H}$  &  $^{13}\text{C}$  NMR data (Fig 4). For instance, the  $^1\text{H}$  NMR spectra of thiazole derivative **10d** showed the singlet signal for the thiazole-H rather than the  $\text{CH}_2$  of thiazole in

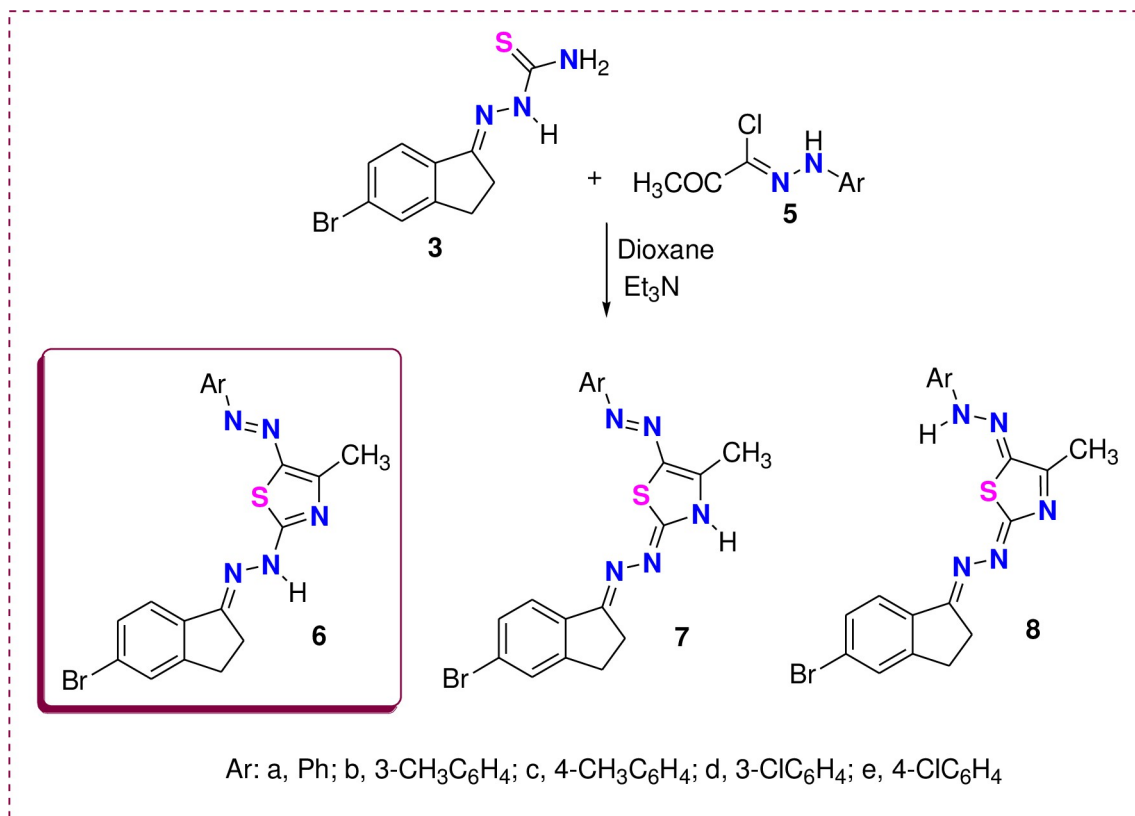

Scheme 2. Synthesis of thiazole derivatives **6a-e**.

<https://doi.org/10.1371/journal.pone.0274459.g005>

Table 1. UV Spectral data of compounds 6a-e in dioxane and thiazole 6a in different solvents.

| Compd. No.              | $\lambda_{\text{max}}$ (log $\epsilon$ )    |
|-------------------------|---------------------------------------------|
| 6a                      | 450 (4.18); 330 (3.80); 241 (4.65)          |
| 6b                      | 453 (4.71); 323 (4.44); 258 (4.53)          |
| 6c                      | 458 (4.81); 326 (4.44); 244 (4.42)          |
| 6d                      | 431 (4.54); 329 (4.31); 255 (4.47)          |
| 6e                      | 450 (5.04); 331 (4.64); 259 (4.77)          |
| 6a (different solvents) | Acetone: 449 (4.85); 327 (4.45);            |
|                         | EtOH: 460 (4.90); 331 (4.55); 258 (4.69);   |
|                         | CH <sub>3</sub> CN: 449 (4.86); 269 (4.99); |
|                         | DMF: 592 (4.41); 458 (5.04); 332 (4.54);    |
|                         | DMSO: 592 (4.28); 463 (4.73); 334 (4.41)    |

<https://doi.org/10.1371/journal.pone.0274459.t001>

isomer **11**. In addition, the  $^{13}\text{C}$  NMR (Fig 4) was completely devoid of thiazole-CH<sub>2</sub> in the aliphatic region, but it revealed 14 carbon signals located in the aromatic region from 105 to 170 ppm.

Finally, conversion of the (5-Bromo-indan-1-ylidene)-hydrazine (**4**) to the formazan derivatives was achieved via the reaction of **4** with hydrazonoyl chloride **5a**, **12**, and **13** in dioxane/Et<sub>3</sub>N under reflux for 5h (Scheme 4). As a result, the formed formazan derivatives **14–16** were assured based on all possible spectral techniques (See Experimental part).

### 3.2. XRD analysis

The XRD of all synthesized thiosemicarbazone derivative **3**, hydrazone **4**, thiazole derivatives **6a–e**, **10a–d**, and formazan derivatives **14a, b**, **15**, and **16** were recorded over  $10^\circ < 2\theta < 80^\circ$  range to evaluate their crystallographic features (Fig 5A–5C). Only five derivatives, **3**, **10a**, **14a**, **15**, and **16**, have crystalline shapes due to the appearance of sharp peaks in their XRD charts. In contrast, the other derivatives were amorphous. Debye–Scherrer equation [58] was used to calculate the size of the crystals of the five derivatives **3**, **10a**, **14a**, **15**, and **16**, and the date was

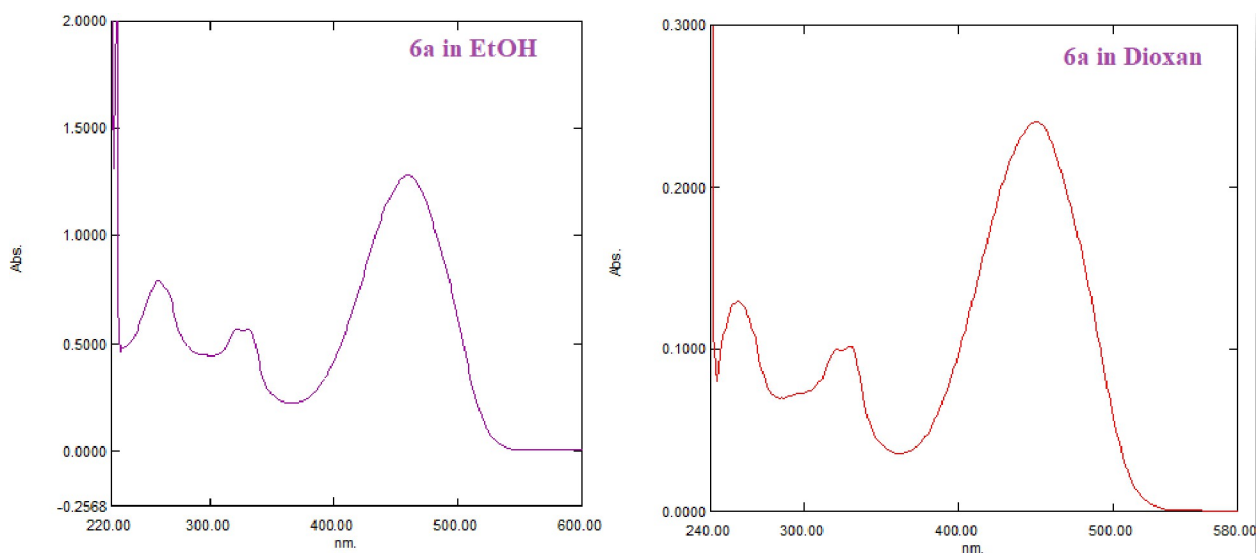

Fig 3. The UV spectra of thiazole derivative 6a in ethanol and dioxane.

<https://doi.org/10.1371/journal.pone.0274459.g004>

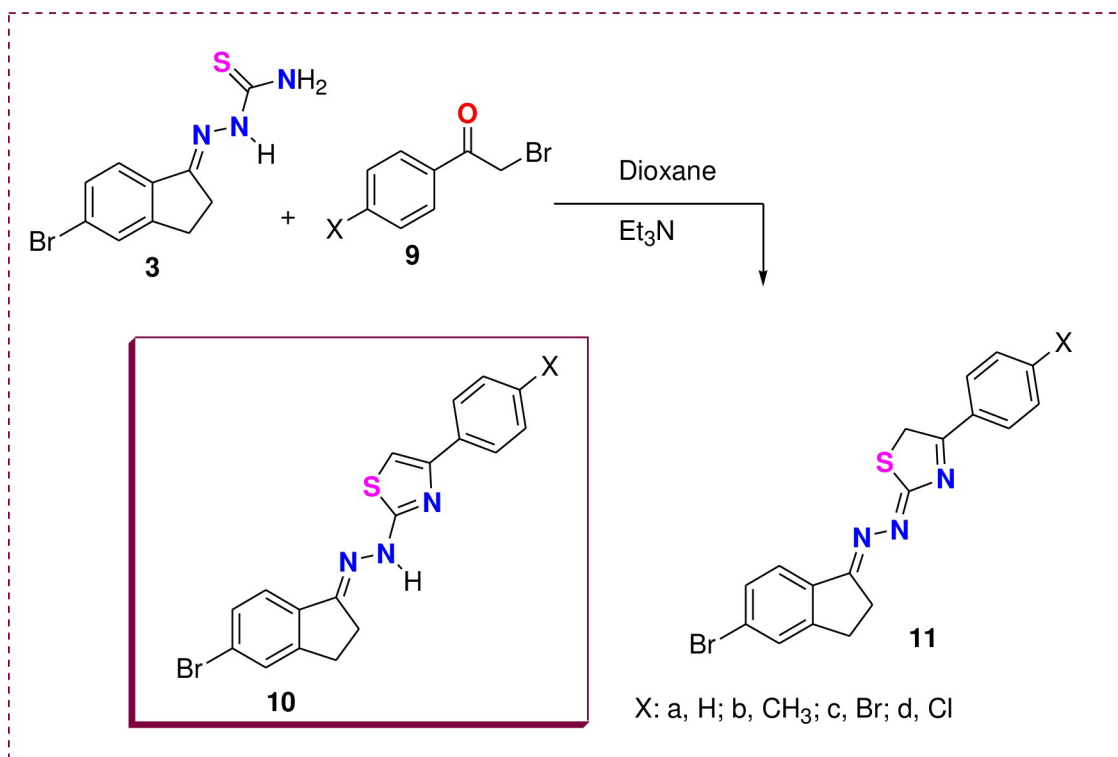

**Scheme 3.** Synthesis of thiazole derivatives 10a-d.

<https://doi.org/10.1371/journal.pone.0274459.g007>

listed in Table 2. The results indicated that all five derivatives were synthesized on the nano-metre scale.

### 3.3 Biological studies

**Anticancer screening.** The scenario of cancer disease is one of the most challenging diseases around the world significantly. Colon and gastric cancer are familiar types in the middle east. Gastric cancer is the third deadliest tumor malignancy worldwide. A new series of substituted thiazoles were tested against two cell lines, **SNU-16** for gastric carcinoma and **Colo205** for colon carcinoma, with two benchmarks, cis-Pt and Sunitinib. Sunitinib is an effective drug for treating both colon and gastric cancer. The mechanism of action of cis-platin has been linked to its ability to crosslink with the purine bases on the DNA, interfering with DNA repair mechanisms, causing DNA damage, and subsequently inducing apoptosis in cancer cells [44].

For SNU-16, from the results obtained in Table 3 & Fig 6, compound 10d represented an excellent  $\text{IC}_{50}$  result better than the two benchmarks used, while compound 16 showed  $\text{IC}_{50}$  better than cis-platin and near Sunitinib. For Colo205,  $\text{IC}_{50}$  values of compounds 14a and 14b are better than cis-pt values, while  $\text{IC}_{50}$  for compounds 4, 6c, 6d, 6e, and 10a are better than the two benchmarks used. The results obtained can be explained in detail and proved by pharmacophore studies. Apoptosis is an essential phenomenon in cytotoxicity induced by anticancer drugs. It is apparent that the molecular mechanisms by which anticancer drugs induce apoptosis are mediated by death receptor-dependent and -independent pathways, which are related to the release of cytochrome c through voltage-dependent anion channels in the mitochondrial inner membrane. The release of cytochrome c is the central gate in turning on/off

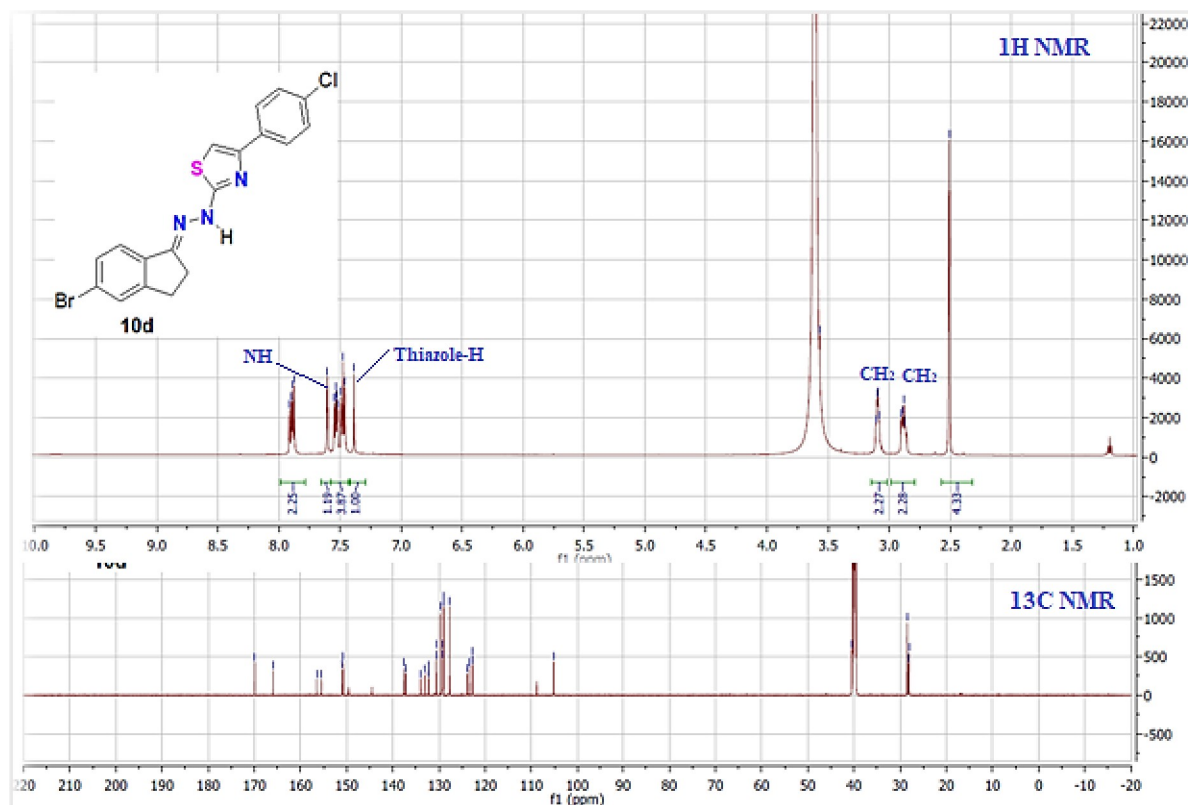

**Fig 4.** The <sup>1</sup>H & <sup>13</sup>C NMR spectra of thiazole derivative 10d.

<https://doi.org/10.1371/journal.pone.0274459.g006>

apoptosis. It is regulated by the interaction of proapoptotic proteins, including Bid, Bax, and Bak, and anti-apoptotic proteins, including Bcl-2 and Bcl-XL, and a specific class of inhibitors of apoptosis proteins (IAPs) including Akt, survivin, and heat-shock proteins. Drug sensitivity can be enhanced by the introduction of proapoptotic genes and the inhibition of anti-apoptotic proteins. The signal transduction pathways triggered by the central gate in mitochondria play a critical role in anticancer drug-induced apoptosis. The modulation of signal transduction pathways targeting the proteins involved in these signal transduction pathways using anti-sense IAPs, and growth factor antibodies may be a good strategy for enhancing the therapeutic efficacy of anticancer drugs in cancer chemotherapy [46–48].

The compounds show good selectivity toward cancerous cells, represented by the “selectivity index.” The selectivity index was previously used to measure selective cytotoxic activity [50]. The selectivity index (SI) can be calculated from the ratio between IC<sub>50</sub> of the compound on a normal cell and the compound on a cancer cell line. For example, the SI of compounds 6d, 10a, 10d, and 16 are 86.98, 76.82, 74.32, and 54.13, respectively.

### 3.4 Computational Insilico-studies

**A-Molecular docking.** Colon and gastric carcinoma are now the most widely spread types of cancer. Therefore, molecular docking studies were performed for selected compounds. According to the results obtained from biological studies, compounds 10d and 16 have been chosen to carry out molecular docking studies on gastric cancer (PDB = 2BID) and colon cancer (PDB = 2A4L). According to the literature, the two proteins were selected [46, 47, 49].

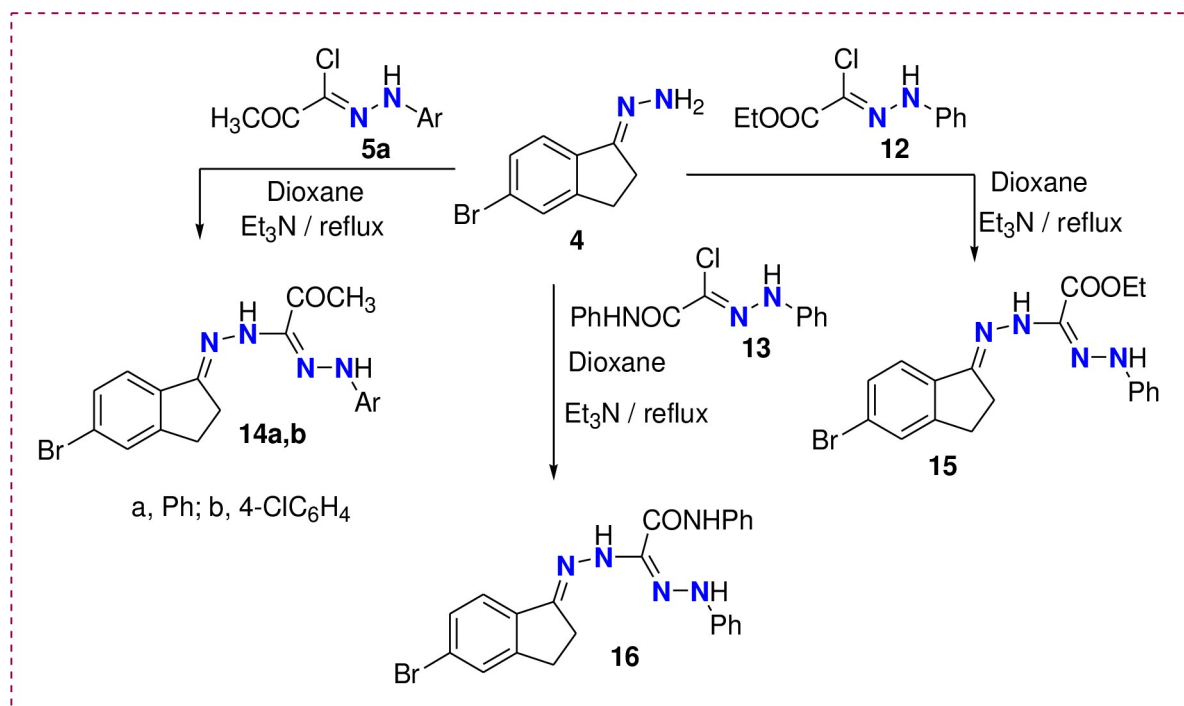

**Scheme 4.** Synthesis of Formazan derivatives 14a, b, 15 and 16.

<https://doi.org/10.1371/journal.pone.0274459.g008>

Fig 7 explains 2D and 3D snapshots of the hydrophilicity interaction to PDB = 2BID and the results obtained for Gastric cancer (PDB = 2BID) receptor. The docking score energies for compounds 10d and 16 are -5.95 and -6.446 kcal/mol, respectively (Table 4). Furthermore, compound 10d interacts from BR18 with O-LEU46(A) by hydrogen donor. Also, it interacted by S26 with OPHE173(A) by hydrogen donor, and finally by 6-ring with 6-ring PHE24(A) by pi-pi interactions (Table 5).

Colon cancer from biological studies, compounds 6d and 10a have chosen to carry out molecular docking studies on colon cancer (PDB = 2A4L), (Fig 8) explain 2D and 3D snapshot of the hydrophilicity interaction to PDB = 2A4L the results obtained for Colon cancer (PDB = 2A4L) receptor. The docking score energies for compounds 6d and 10a are -7.279 and -6.63 kcal/mol, respectively (Table 6). In addition, compound 6d interacts from C10 with 5-ring HIS 125 (A) by H-pi. It was also interacted by 5-ring HIS 125 (A)N CYS 118 (A) by pi-H. At the same time, compound 10a interacted from 6-ring at N-ASN132 (A) by pi-H and from 5-ring at 5-ring HIS 125 (A) by pi-pi (Table 7).

**B-Pharmacophore and ADME studies.** The predicted pharmacokinetic/Molinspiration properties of the new starting thiosemicarbazone, hydrazone, thiazole, and formazan derivatives 3–16, are given in Tables 8 & 9. With the help of Molinspiration virtual screening, most of the tested compounds showed good bioactivity as indicated from docking studies in Tables 4–7, which indicates the drug-likeness properties against kinase inhibitor, protease, and enzyme inhibitors.

The Calculated distribution of activity scores (version 2011.06) for GPCR ligands, kinase inhibitors, ion channel modulators, nuclear receptor ligands, protease inhibitors, and other enzyme targets compared with scores for about 100'000 average drug-like molecules. The score allows efficient separation of active and inactive molecules [52–57].



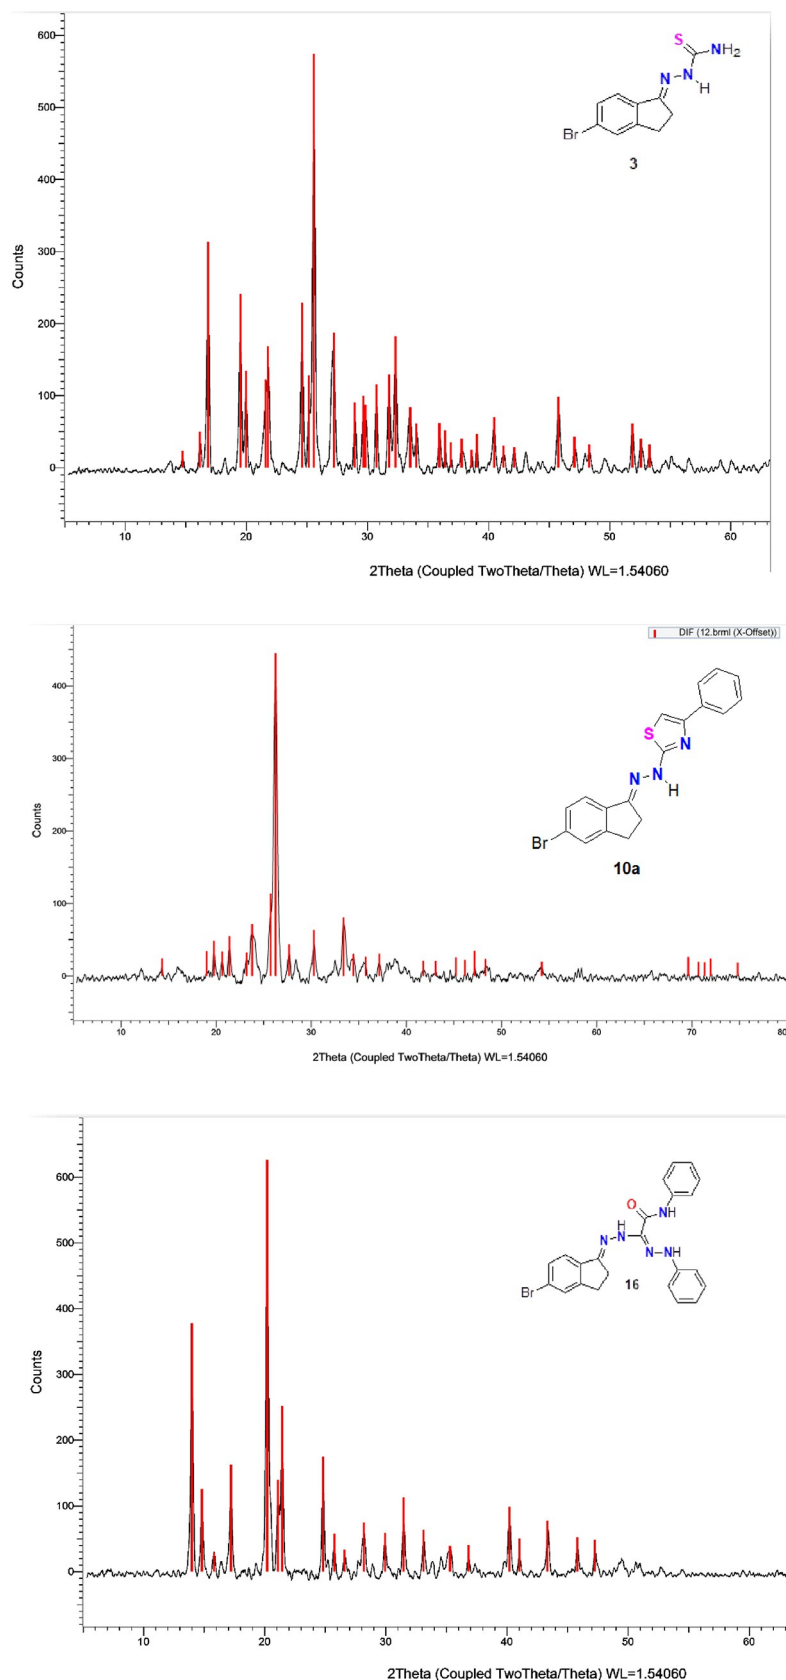

**Fig 5.** The XRD chart for compound 3. a. 4b. The XRD chart for compound 10a. 4c. The XRD chart for compound 16.

<https://doi.org/10.1371/journal.pone.0274459.g009>

Table 2. XRD parameters for nano-crystalline 3, 10a, 14a, 15 and 16 derivatives.

| Compounds | Size (nm) | 2 $\theta$ | Intensity | FWHM   |
|-----------|-----------|------------|-----------|--------|
| 3         | 7.766     | 25.5       | 565       | 0.1023 |
| 10a       | 3.372     | 26.1       | 440       | 0.2356 |
| 14a       | 3.10      | 26.8       | 240       | 0.2562 |
| 15        | 8.0       | 27.0       | 515       | 0.0998 |
| 16        | 7.71      | 20.2       | 620       | 0.1030 |

<https://doi.org/10.1371/journal.pone.0274459.t002>

*C-1- Pred-hERG.* Chemically similar compounds often bind biologically diverse protein targets, and protein structures do not always recognize identical ligands. Pharmacological and off-target relationships among proteins and a ligand set similarity help to improve the machine learning confidence by interpolating the output prediction equalized by the compound similarity criteria. This pipeline help to improve the predictions of off-target drug effects, reducing the false-negative error. The chemical similarity is one of the essential concepts in cheminformatics. One commonly used to calculate these similarity algorithm measures is the 2D Tanimoto algorithm. The resulting Tanimoto coefficient is fingerprint-based, encoding each molecule to a fingerprint "bit" position (MACCS), with each bit recording the presence ("1") or absence ("0") of a fragment of the molecule (Figs 9–13).

Probability map of HERG of **10d**, **16**, **6d**, and **10a**. The more depth lines and the more intense green color imply a higher positive contribution of an atom or a fragment to the hERG blockage, while pink means that it contributes to decreasing hERG blockage and gray means no contribution.

*C-2. Pro-ToxII.* The ProTox-II (Fig 14 & Table 10) showed that the four compounds are predicted to have oral LD<sub>50</sub> values ranging from 335 to 3500 mg/kg in a rat model with (1 s,4 s)-Eucalyptol bearing the highest values and quercetin holding the lowest one [57, 58].

Table 3. The IC<sub>50</sub> of the anti-gastric and anti-colon cancer activities of the synthesized derivatives 3, 4, 6a-e, 10a-d, 14a, b, 15 and 16.

| Sample              | IC <sub>50</sub> uM<br>Gastric (SNU-16)<br>Patch number (ATCC CRL-5822) | IC <sub>50</sub> uM<br>Colon / (COLO205) | IC <sub>50</sub> uM | SI    |
|---------------------|-------------------------------------------------------------------------|------------------------------------------|---------------------|-------|
| 3                   | 19.01 ± 0.133                                                           | 14.10 ± 0.04                             | > 100               | ---   |
| 4                   | 23.20 ± 0.204                                                           | 8.167 ± 0.07                             | > 100               | ---   |
| 6a                  | 21.79 ± 0.076                                                           | 17.14 ± 0.12                             | > 100               | ---   |
| 6b                  | 12.28 ± 0.03                                                            | 9.813 ± 0.005                            | > 100               | ---   |
| 6c                  | 12.89 ± 0.076                                                           | 7.576 ± 0.07                             | > 100               | ---   |
| 6d                  | 19.79 ± 0.129                                                           | 6.958 ± 0.04                             | 605.27 ± 35.21      | 86.98 |
| 6e                  | 26.19 ± 0.12                                                            | 7.276 ± 0.03                             | > 100               | ---   |
| 10a                 | 19.96 ± 0.64                                                            | 6.301 ± 0.008                            | 484.61 ± 7.89       | 76.82 |
| 10b                 | 18.27 ± 0.39                                                            | 12.08 ± 0.006                            | > 100               | ---   |
| 10c                 | 26.80 ± 0.6                                                             | 13.81 ± 0.025                            | > 100               | ---   |
| 10d                 | 7.576 ± 0.075                                                           | 12.16 ± 0.06                             | 563.07 ± 44.19      | 74.32 |
| 14a                 | 14.90 ± 0.3                                                             | 11.27 ± 0.046                            | > 100               | ---   |
| 14b                 | 13.81 ± 0.69                                                            | 10.61 ± 0.09                             | > 100               | ---   |
| 15                  | 16.64 ± 0.38                                                            | 13.63 ± 0.04                             | > 100               | ---   |
| 16                  | 9.699 ± 0.0726                                                          | 13.04 ± 0.025                            | 524.93 ± 36.18      | 54.13 |
| sunitinib           | 8.450 ± 0.023                                                           | 11.27 ± 0.033                            | 378.50 ± 31.84      | ---   |
| Blank ref Cisplatin | 11.27 ± 0.076                                                           | 9.130 ± 0.07                             | 548.13 ± 61.18      | ---   |

<https://doi.org/10.1371/journal.pone.0274459.t003>

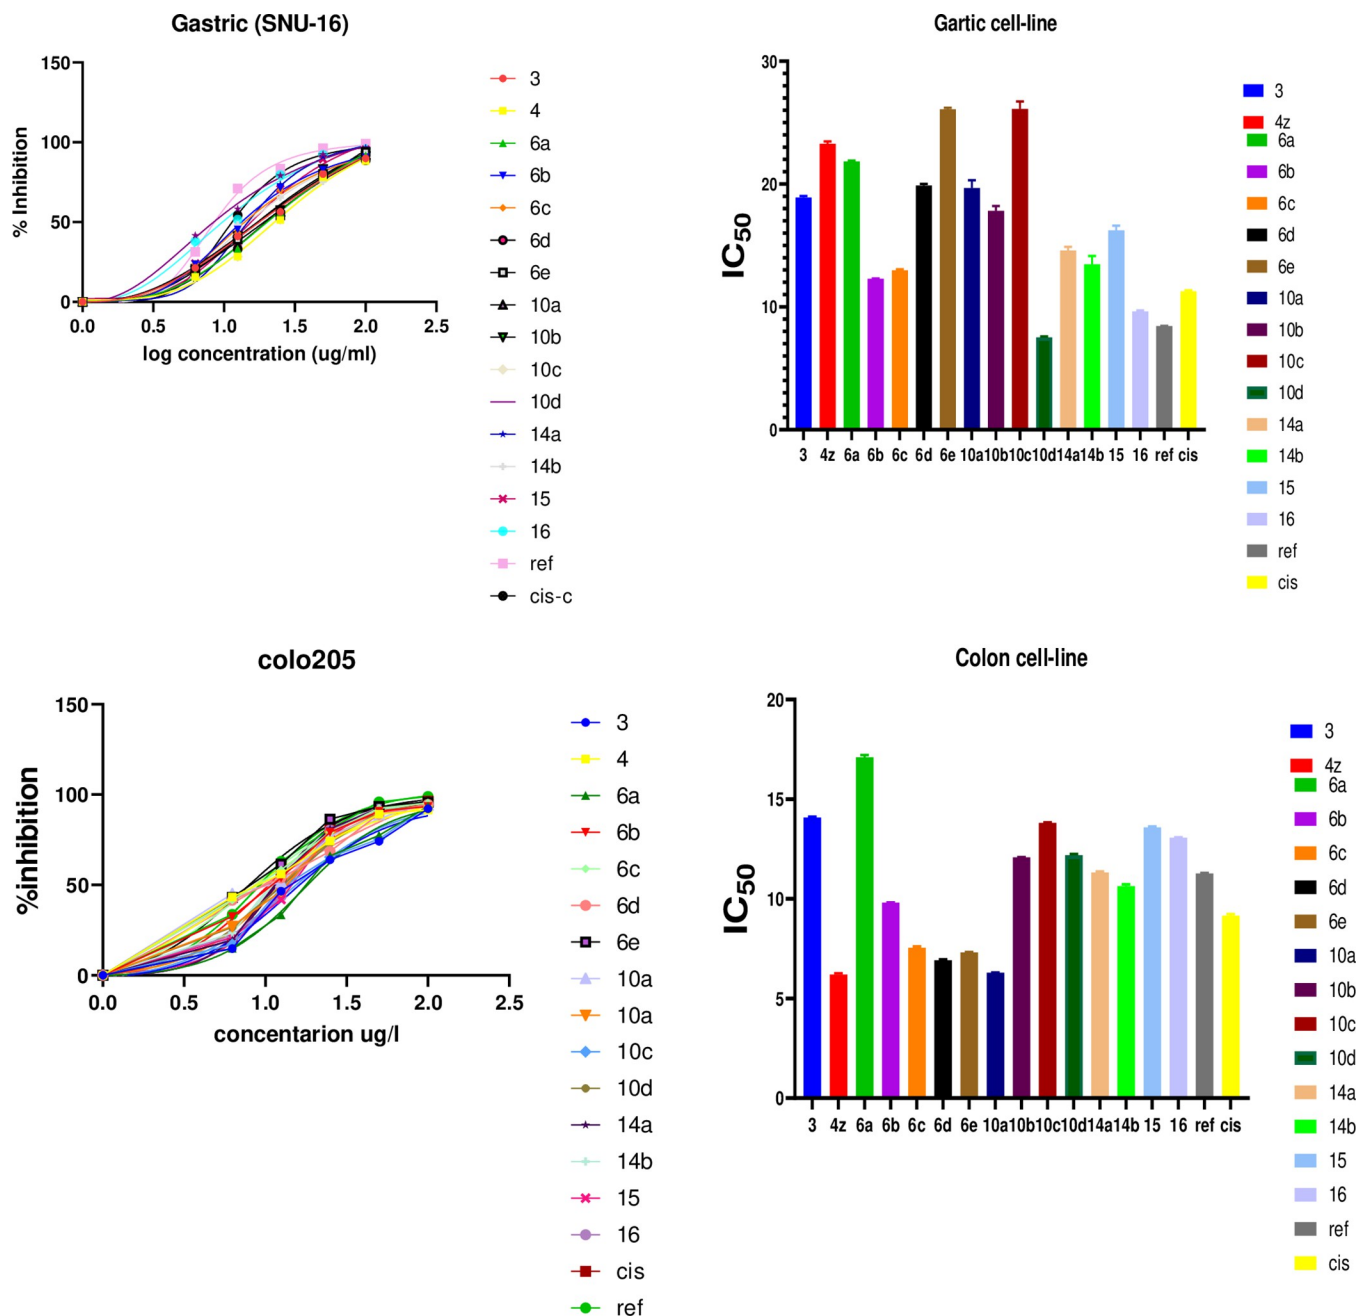

Fig 6. Anti-gastric and anti-colon activities for the tested derivatives.

<https://doi.org/10.1371/journal.pone.0274459.g010>

## 4. Conclusion

Herein, the new series of thiazole and formazan linked to 5-Bromo-indan and their structures were assured based on all possible analytical techniques. Five derivatives were precipitated on a nanosized scale. The anticancer activity of the tested derivatives indicated that one derivative, **10d** showed activity more than the two reference drugs 49 used in the case of SNU-16, while the IC<sub>50</sub> of five derivatives was better than the two benchmarks used in the case of COLO205. All potent derivatives showed a strong fit with the active site of the two tested proteins (gastric

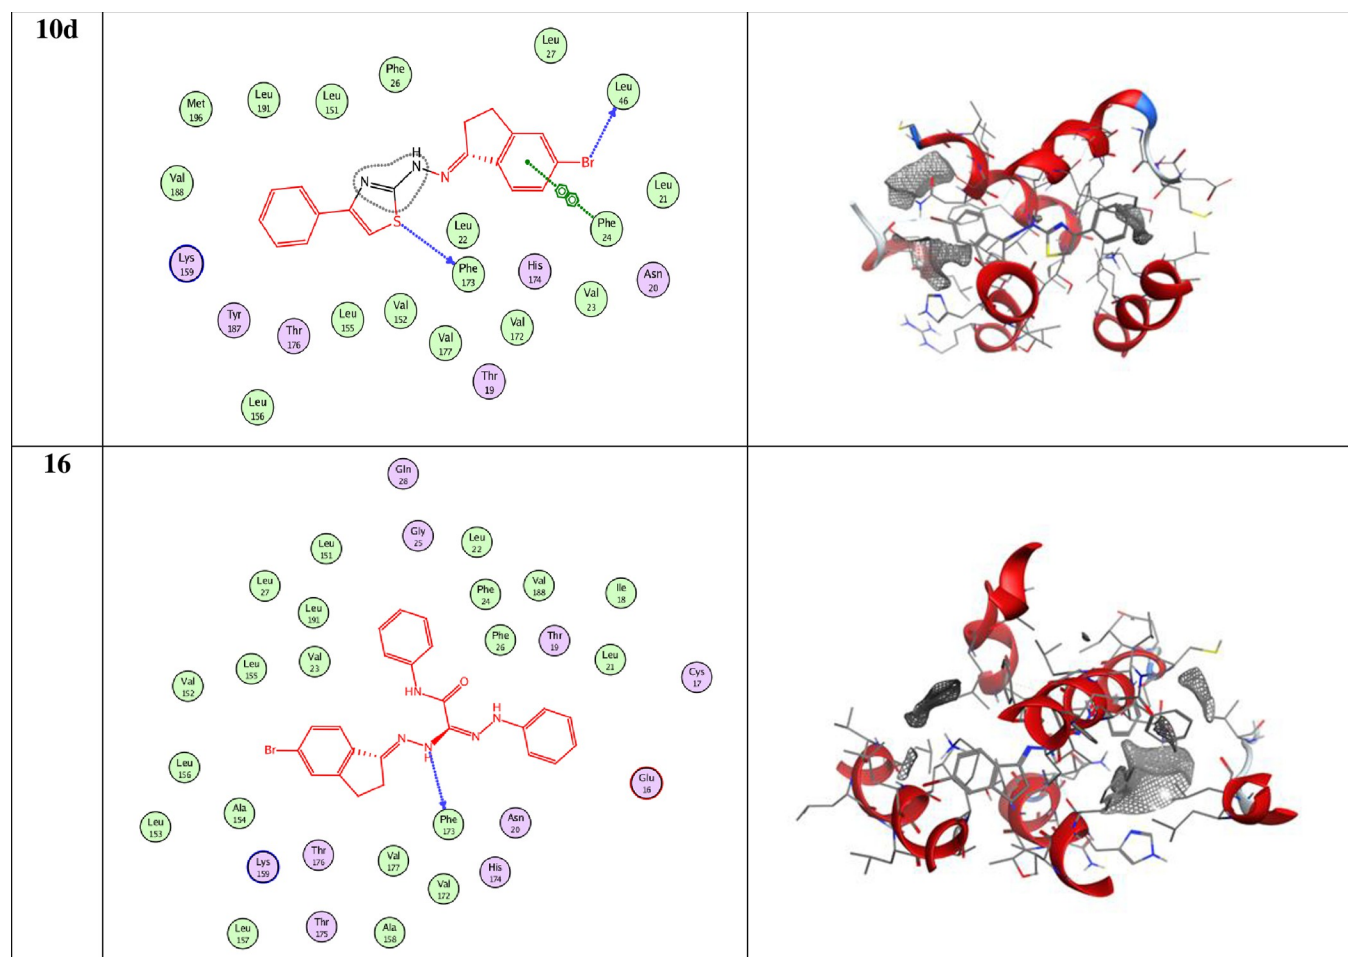

Fig 7. 2D and 3D snapshots showing the hydrophilicity interaction to Gastric (SNU-16) Gastric cancer (2BID) receptor.

<https://doi.org/10.1371/journal.pone.0274459.g011>

cancer (PDB = **2BID**) and colon cancer (PDB = **2A4L**) in the molecular docking study. The Pharmacophore and ADME studies of the new derivatives showed that most derivatives revealed promising bioactivity, which indicates the drug-likeness properties against kinase inhibitors, protease, and enzyme inhibitors. In addition, the ProTox-II showed that the four

Table 4. Docking score and energies of compounds with Gastric (SNU-16) Gastric cancer (2BID) receptor.

| Comp. | S      | rmsd_refine | E_conf  | E_place | E_score1 | E_refine | E_score2 |
|-------|--------|-------------|---------|---------|----------|----------|----------|
| 10d   | -5.95  | 3.27        | 58.18   | -42.83  | -8.820   | -23.632  | -5.95    |
|       | -5.75  | 2.47        | 55.72   | -57.78  | -9.173   | -29.642  | -5.75    |
|       | -5.65  | 1.15        | 65.94   | -51.168 | -8.379   | -21.93   | -5.65    |
|       | -5.48  | 1.71        | 56.706  | -27.76  | -8.405   | -18.86   | -5.48    |
|       | -5.34  | 1.69        | 67.41   | -44.112 | -8.521   | -23.63   | -5.34    |
| 16    | -6.446 | 1.692       | 106.16  | -69.134 | -9.549   | -30.241  | -6.446   |
|       | -6.397 | 1.592       | 99.397  | -63.030 | -8.276   | -33.228  | -6.397   |
|       | -6.238 | 1.631       | 103.751 | -58.854 | -8.854   | -35.050  | -6.238   |
|       | -6.232 | 2.120       | 101.603 | -65.155 | -9.013   | -33.661  | -6.232   |
|       | -6.083 | 2.375       | 102.335 | -34.123 | -8.674   | -29.870  | -6.083   |

<https://doi.org/10.1371/journal.pone.0274459.t004>

Table 5. Docking interaction of all compounds Gastric (SNU-16) Gastric cancer (2BID) receptor.

| Compound | Ligand | Receptor          | Interaction | Distance E | (kcal/mol) |
|----------|--------|-------------------|-------------|------------|------------|
| 10d      | BR 18  | O LEU 46 (A)      | H-donor     | 2.88       | -3.3       |
|          | S 26   | O PHE 173 (A)     | H-donor     | 3.71       | -1.2       |
|          | 6-ring | 6-ring PHE 24 (A) | pi-pi       | 3.96       | -0.0       |
| 16       | N 19   | O PHE 173 (A)     | H-donor     | 3.44 -     | -1.1       |
|          | N 28   | 6-ring PHE 26 (A) | H-pi        | 3.38       | -0.5       |

<https://doi.org/10.1371/journal.pone.0274459.t005>

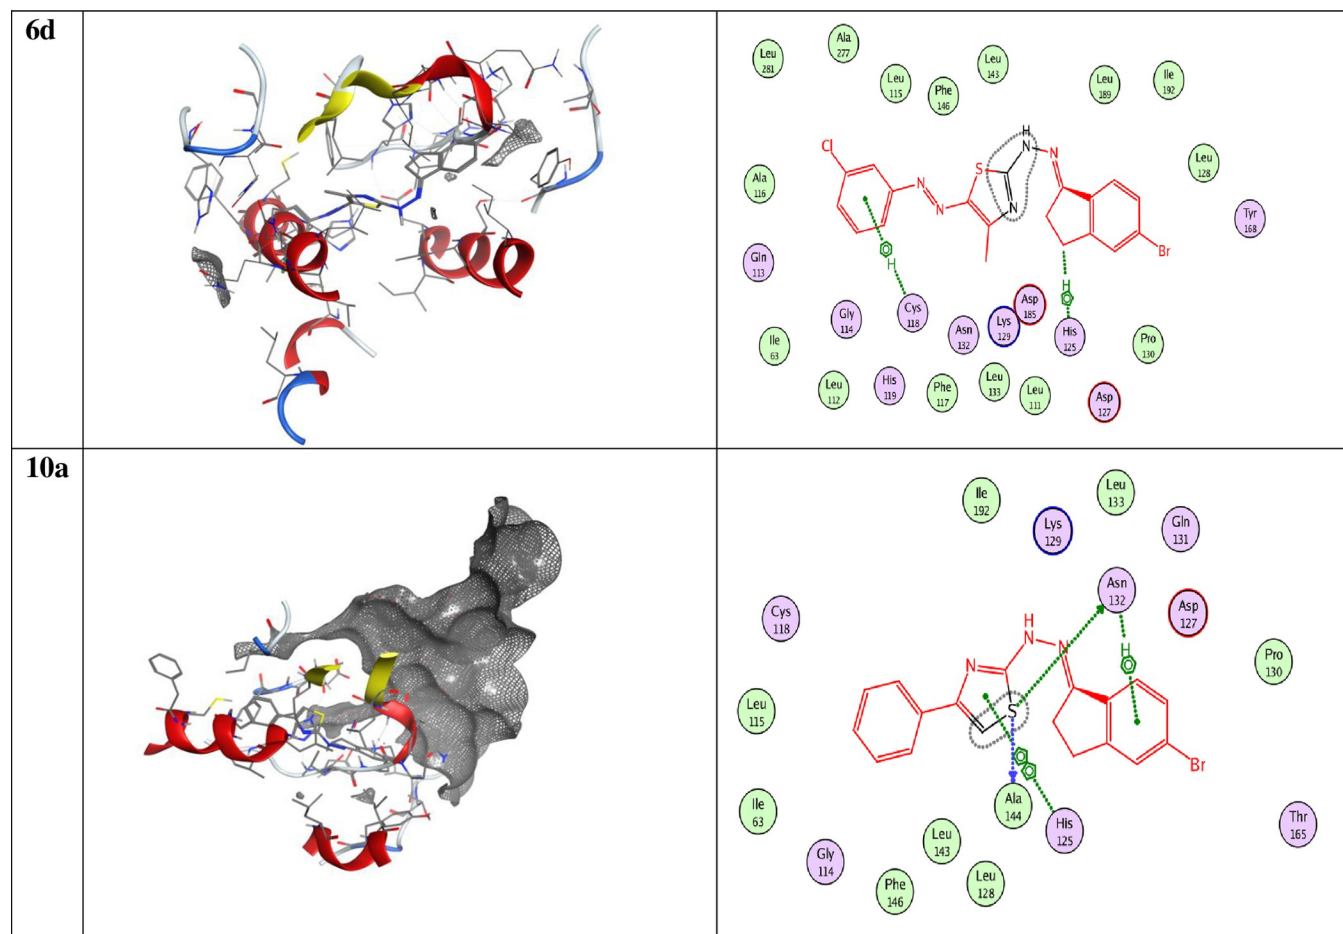

Fig 8. 2D and 3D snapshots showing the hydrophilicity interaction to colo205 (PDB = 2A4L).

<https://doi.org/10.1371/journal.pone.0274459.g012>

compounds **10d**, **16**, **6d**, and **10a** are predicted to have oral LD<sub>50</sub> values ranging from 335 to 3500 mg/kg in a rat model with (1 s,4 s)-Eucalyptol bearing the highest values and quercetin holding the lowest one. Pred-hERG model played an important rule as SAR tool with predication of the most common like drugs like the new series synthesized with the interpretation of Probability of toxicity for compounds.



Table 6. Docking score and energies of compounds with Colo205 (PDB = 2A4L).

| Comp. | S      | rmsd_refine | E_conf | E_place | E_score1 | E_refine | E_score2 |
|-------|--------|-------------|--------|---------|----------|----------|----------|
| 6d    | -7.279 | 1.447       | 82.160 | -61.66  | -9.826   | -41.907  | -7.279   |
|       | -6.962 | 0.956       | 78.173 | -72.401 | -11.326  | -36.515  | -6.962   |
|       | -6.890 | 2.030       | 47.680 | -92.803 | -10.254  | -39.582  | -6.890   |
|       | -6.746 | 1.430       | 80.166 | -71.021 | -10.049  | -29.935  | -6.746   |
|       | -6.697 | 1.558       | 53.510 | -78.718 | -10.571  | -41.219  | -6.697   |
| 10a   | -6.613 | 3.038       | 65.314 | -63.873 | -10.547  | -33.843  | -6.613   |
|       | -6.475 | 1.508       | 58.529 | -58.031 | -10.020  | -27.089  | -6.475   |
|       | -6.452 | 1.384       | 65.491 | -78.712 | -10.125  | -32.785  | -6.452   |
|       | -6.245 | 1.425       | 55.781 | -67.577 | -9.897   | -32.404  | -6.245   |
|       | -6.234 | 1.533       | 63.883 | -63.923 | -10.094  | -32.176  | -6.234   |

<https://doi.org/10.1371/journal.pone.0274459.t006>

Table 7. Docking interaction of all compounds Gastric (SNU-16) Gastric cancer (2BID) receptor.

| Compound | Ligand | Receptor           | Interaction | Distance E | (kcal/mol) |
|----------|--------|--------------------|-------------|------------|------------|
| 6a       | C 10   | 5-ring HIS 125 (A) | H-Pi        | 3.60       | -1.0       |
|          | 5-ring | N CYS 118 (A)      | Pi-H        | 4.22       | -1.1       |
| 10a      | 6-ring | N ASN 132 (A)      | pi-H        | 4.30       | -1.3       |
|          | 5-ring | 5-ring HIS 125 (A) | pi-pi       | 3.65       | -0.0       |

<https://doi.org/10.1371/journal.pone.0274459.t007>

Table 8. Physicochemical properties of the synthesized compounds.

| Compd. | miLogP | TPSA  | n-atoms | MW     | nON | nOHNH | n-violations | nroth | Volume |
|--------|--------|-------|---------|--------|-----|-------|--------------|-------|--------|
| 3      | 2.47   | 50.41 | 15      | 284.18 | 3   | 3     | 0            | 2     | 199.50 |
| 4      | 2.28   | 38.39 | 12      | 225.09 | 2   | 2     | 0            | 2     | 159.24 |
| 6a     | 5.94   | 62.01 | 26      | 426.34 | 5   | 1     | 1            | 4     | 325.39 |
| 6b     | 6.37   | 62.01 | 27      | 440.37 | 5   | 1     | 1            | 4     | 341.95 |
| 6c     | 6.39   | 62.01 | 27      | 440.37 | 5   | 1     | 1            | 4     | 341.95 |
| 6d     | 6.59   | 62.01 | 27      | 460.79 | 5   | 1     | 1            | 4     | 338.93 |
| 6e     | 6.62   | 62.01 | 27      | 460.79 | 5   | 1     | 1            | 4     | 338.93 |
| 10a    | 5.08   | 37.28 | 23      | 384.30 | 3   | 1     | 1            | 3     | 289.33 |
| 10b    | 5.53   | 37.28 | 24      | 398.33 | 3   | 1     | 1            | 3     | 306.29 |
| 10c    | 5.88   | 37.28 | 24      | 463.2  | 3   | 1     | 1            | 3     | 307.61 |
| 10d    | 5.75   | 37.28 | 24      | 418.75 | 3   | 1     | 1            | 3     | 303.26 |
| 14a    | 5.11   | 65.85 | 25      | 385.26 | 5   | 2     | 1            | 5     | 309.7  |
| 14b    | 5.79   | 65.85 | 25      | 419.71 | 5   | 2     | 1            | 5     | 316.5  |
| 15     | 5.80   | 75.09 | 26      | 415.29 | 6   | 2     | 1            | 7     | 328.76 |
| 16     | 6.37   | 77.88 | 30      | 462.35 | 6   | 3     | 1            | 6     | 370.22 |

<https://doi.org/10.1371/journal.pone.0274459.t008>

Table 9. Physicochemical Molinspiration bioactivity score.

| Compound | GPCR ligand | Ion channel modulator | Kinase inhibitor | Nuclear receptor ligand | Protease inhibitor | Enzyme inhibitor |
|----------|-------------|-----------------------|------------------|-------------------------|--------------------|------------------|
| 3        | -1.13       | -0.91                 | -1.15            | -1.43                   | -1.11              | -0.29            |
| 4        | -0.75       | -0.94                 | -1.02            | -1.04                   | -1.57              | -0.34            |
| 5        | -0.47       | -0.67                 | -0.25            | -1.03                   | -0.78              | -0.19            |
| 6a       | -0.49       | -0.70                 | -0.27            | -1.02                   | -0.80              | -0.24            |
| 6b       | -0.48       | -0.69                 | -0.27            | -1.02                   | -0.80              | -0.22            |
| 6c       | -0.48       | -0.69                 | -0.27            | -1.02                   | -0.80              | -0.22            |
| 6d       | -0.47       | -0.65                 | -0.26            | -1.02                   | -0.83              | -0.23            |
| 6e       | -0.46       | -0.65                 | -0.26            | -1.01                   | -0.80              | -0.21            |
| 10a      | -0.38       | -0.65                 | -0.23            | -0.79                   | -0.69              | -0.07            |
| 10b      | -0.41       | -0.7                  | -0.26            | -0.78                   | -0.71              | -0.31            |
| 10c      | -0.36       | -0.62                 | -0.22            | -0.75                   | -0.65              | -0.07            |
| 10d      | -0.37       | -0.63                 | -0.24            | -0.77                   | -0.69              | -0.10            |
| 14a      | -0.21       | -0.54                 | -0.60            | -0.70                   | -0.56              | -0.27            |
| 14b      | -0.20       | -0.52                 | -0.60            | -0.69                   | -0.58              | -0.29            |
| 15       | -0.28       | -0.52                 | -0.56            | -0.66                   | -0.53              | -0.30            |
| 16       | -0.18       | -0.44                 | -0.37            | -0.62                   | -0.42              | -0.23            |

<https://doi.org/10.1371/journal.pone.0274459.t009>

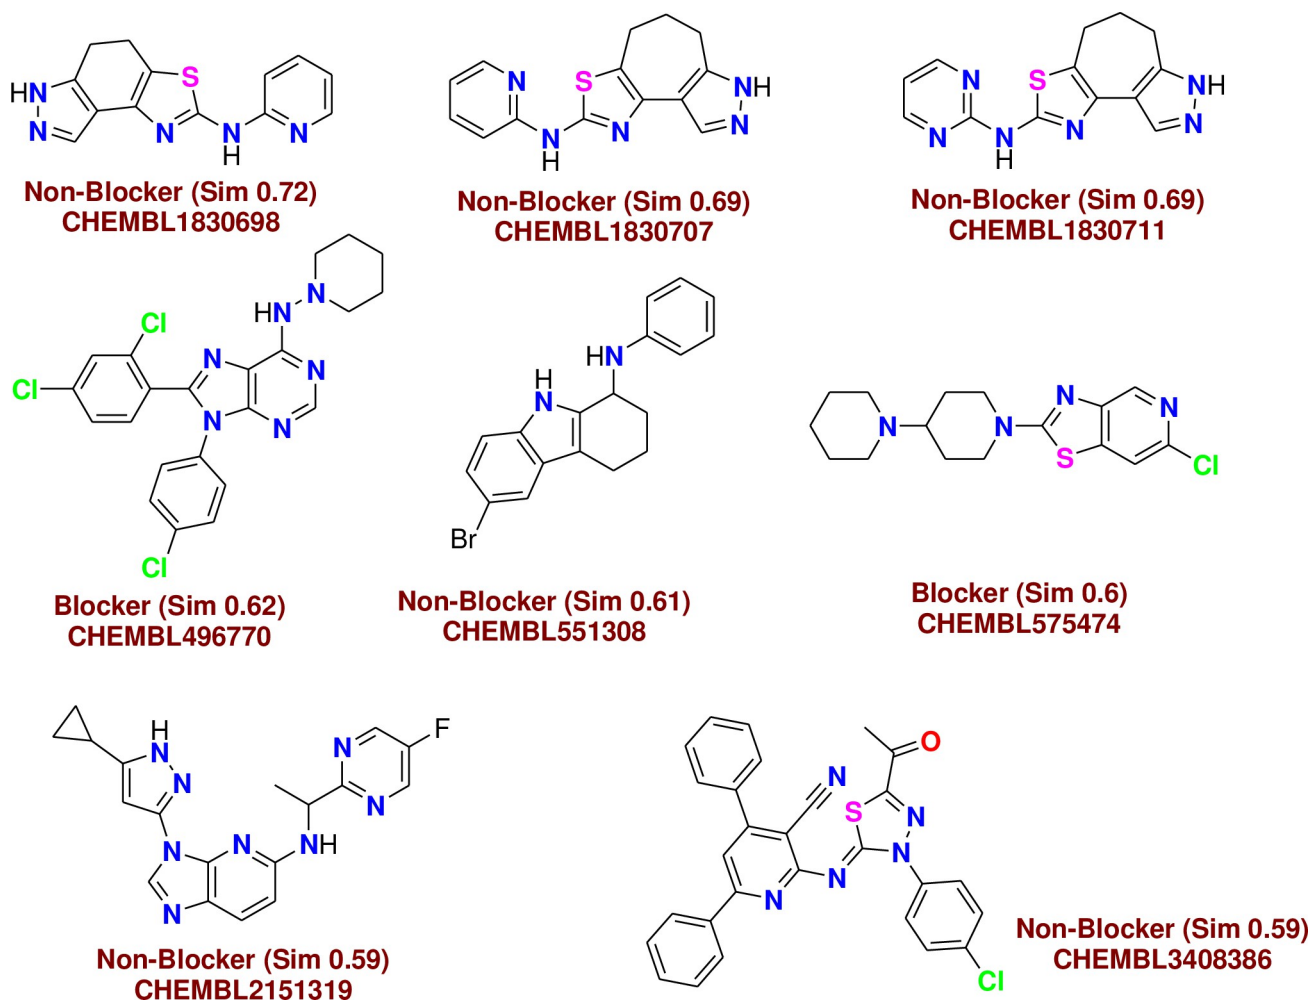

Fig 9. Similar off-target compounds of compound 10d.

<https://doi.org/10.1371/journal.pone.0274459.g013>

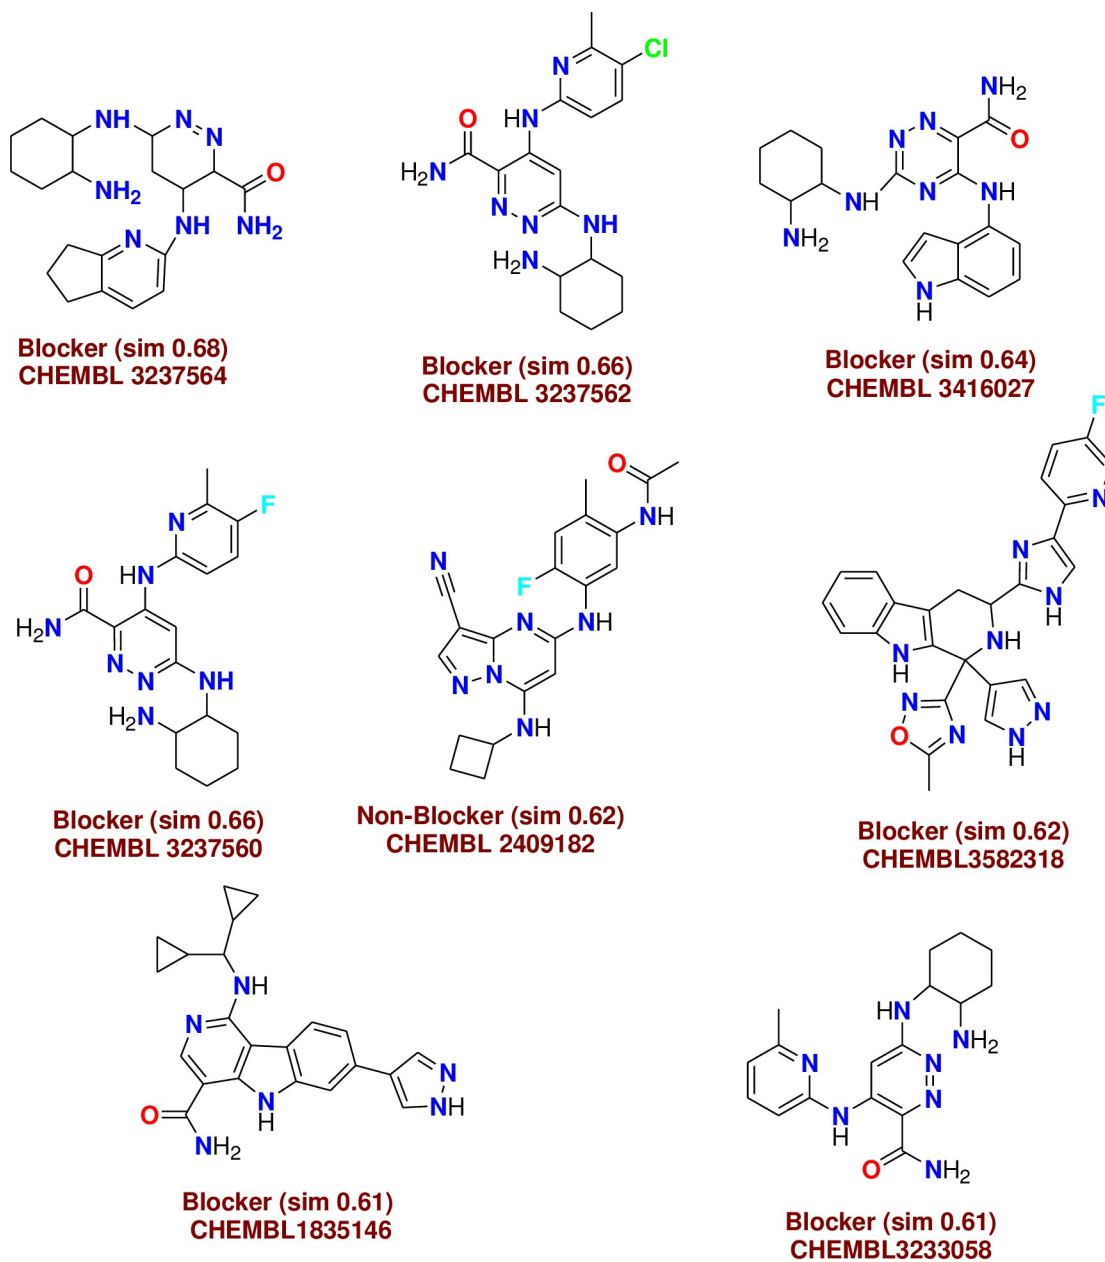

Fig 10. Similar off-target compounds of compound 16.

<https://doi.org/10.1371/journal.pone.0274459.g014>

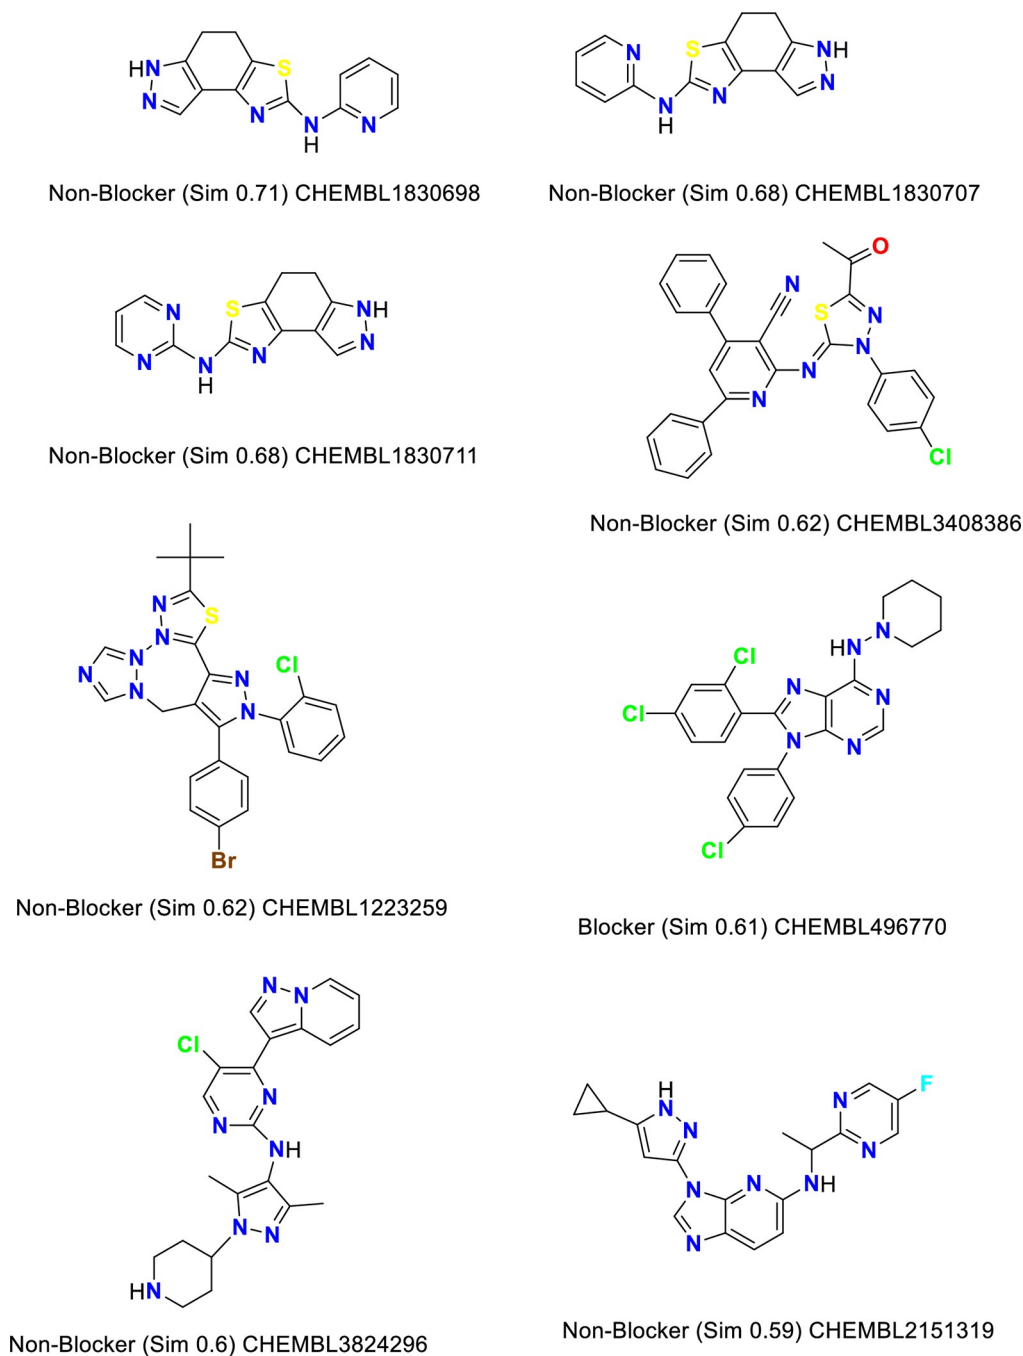

**Fig 11. Similar off-target compounds of compound 6d.**

<https://doi.org/10.1371/journal.pone.0274459.g015>

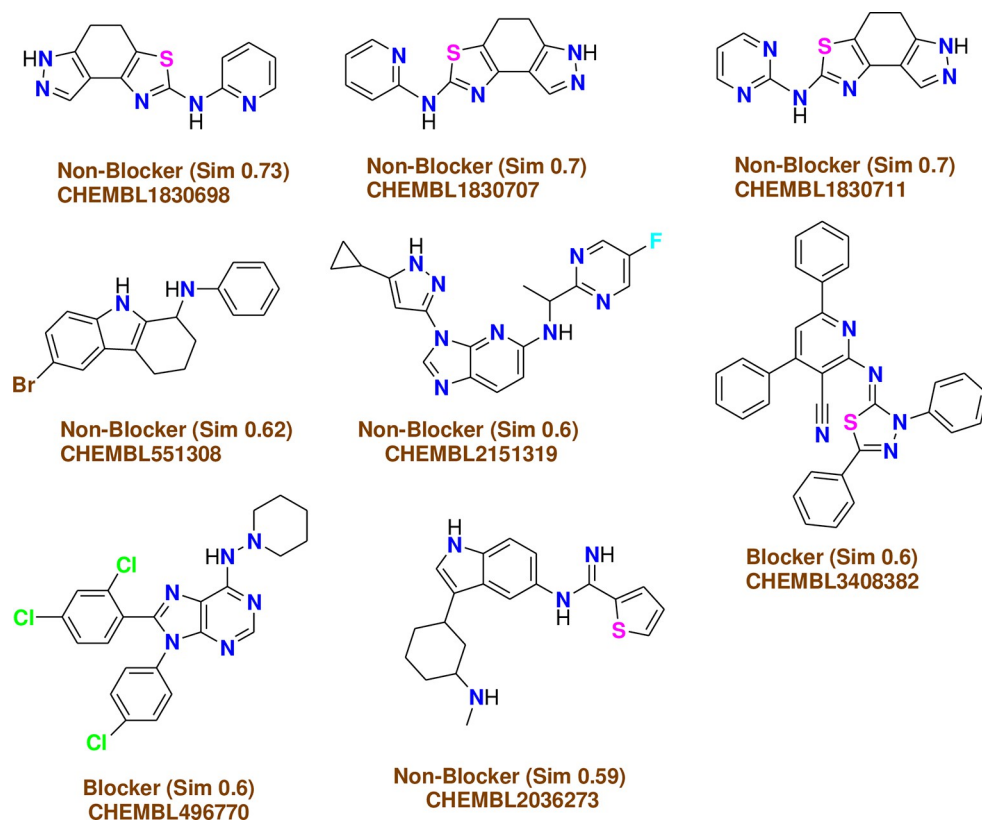

Fig 12. Similar off-target compounds of compound 10a.

<https://doi.org/10.1371/journal.pone.0274459.g016>

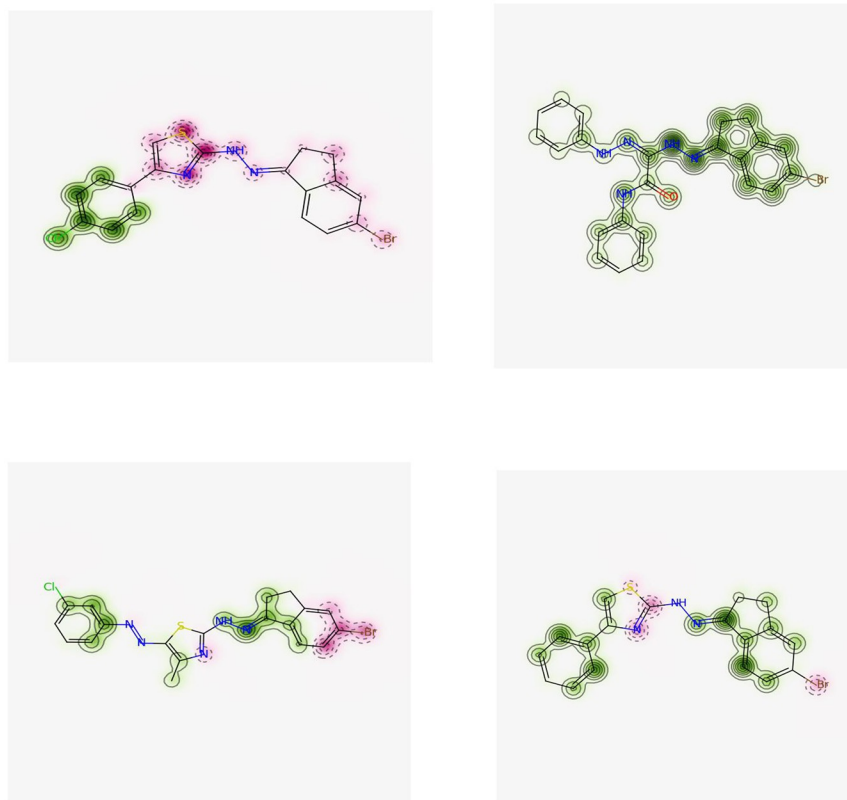

Fig 13. Interpretation of probability of toxicity for compounds 10d, 16, 6d, and 10a.

<https://doi.org/10.1371/journal.pone.0274459.g017>



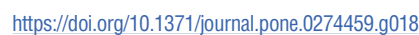

|                           | 10d                                | 16                                 | 6d                                 | 10a                              |
|---------------------------|------------------------------------|------------------------------------|------------------------------------|----------------------------------|
| Pro-ToxII                 |                                    |                                    |                                    |                                  |
| Predicted LD50 (mg/kg)    | 335                                | 3500                               | 1000                               | 300                              |
| Predicted toxicity class  | 3                                  | 5                                  | 4                                  | 3                                |
| Average similarity (%)    | 46.52                              | 47.3                               | 33.02                              | 44.28                            |
| Prediction accuracy (%)   | 54.26%                             | 54.26%                             | 23                                 | 54.26                            |
| Pred-hERG                 |                                    |                                    |                                    |                                  |
| Prediction/Potency        | Weak or Moderate                   | Weak or Moderate                   | strong                             | Weak or Moderate                 |
| Confidence (%)            | 60                                 | 60                                 | 70                                 | 60                               |
| Applicability domain (AD) | No (Value = 0.24 and limit = 0.26) | No (Value = 0.24 and limit = 0.26) | No (Value = 0.24 and limit = 0.26) | No Value = 0.22 and limit = 0.26 |

24 / 28

## Supporting information

**S1 File.** All spectral charts and the pictures of instruments were listed in the supplementary file.

(DOCX)

## Author Contributions

**Conceptualization:** Ghaidaa H. Alfaifi.

**Data curation:** Ghaidaa H. Alfaifi, Thoraya A. Farghaly.

**Formal analysis:** Ghaidaa H. Alfaifi.

**Funding acquisition:** Magda H. Abdellattif.

**Investigation:** Thoraya A. Farghaly.

**Methodology:** Ghaidaa H. Alfaifi.

**Project administration:** Thoraya A. Farghaly.

**Software:** Magda H. Abdellattif.

**Validation:** Magda H. Abdellattif.

**Visualization:** Magda H. Abdellattif.

**Writing – original draft:** Magda H. Abdellattif.

**Writing – review & editing:** Thoraya A. Farghaly.

## References

1. Lagergren P, Schandl A, Aaronson NK et al. Cancer survivorship: an integral part of Europe's research agenda. *Mol. Oncol.* 13(3), 624–635 (2018).
2. (a) M. S. Malik, R. A. Alsantali, A. Y. A. Alzahrani, Q. M. S. Jamal, E. M. Hussein, K. A. Alfaifi, M. M. Al-Rooqi, R. J. Obaid, M. A. Alsharif, S. F. Adil, R. S. Jassas, Z. Moussa, S. A. Ahmed. Multicomponent synthesis, cytotoxicity, and computational studies of novel imidazopyridazine-based N-phenylbenzamidines. *Journal of Saudi Chemical Society*, 2022, 26, 101449; (b) M. S. Malik, R. I. Alsantali, Q. M. S. Jamal, Z. S. Seddigi, M. Morad, M. A. Alsharif, E. M. Hussein, R. S. Jassas, M. M. Al-Rooqi, Z. Abdulja-leel, A. O. Babalghith, H. M. Altass, Z. Moussa, S. A. Ahmed. New Imidazole-Based N-Phenylbenzamide Derivatives as Potential Anticancer Agents: Key Computational Insights. *Front. Chem.*, 2022, 9, 808556. <https://doi.org/10.3389/fchem.2021.808556>
3. (a) O. A. Azher, A. Hossan, R. A. Pashameah, A. Alsoliemy, A. Alharbi, T. M. Habeebullah, N. M. El-Metwaly. Synthesis, anticancer evaluation, and molecular modeling study of new 2-(phenylamino)pyrazolo[1,5-a]pyrimidine analogues. *Arabian Journal of Chemistry*, 2023, 16, 104437; (b) P. Yadav, A. Kumar, I. Althagafi, V. Nemaysh, R. Rai, R. Pratap. The Recent Development of Tetrahydro-Quinoline/Isoquinoline Based Compounds as Anticancer Agents Current Topics in Medicinal Chemistry, 2021, 21, 1587-1622; (c) R. Shah, T. M. Habeebullah, F. Saad, I. Althagafi, A. Y. Al-dawood, A. M. Al-Solimy, Z. A. Al-Ahmed, F. Al-Zahrani, T. A. Farghaly, N. El-Metwaly. Characterization of new Co(II) complexes and photographic monitoring for their toxic impact on breast cancer cells according to simulation study. *Applied Organometallic Chemistry*, 2020, 34, e5886
4. Awasthi R, Roseblade A, Hansbro PM, Rathbone MJ, Dua K, Bebaewy M. Nanoparticles in cancer treatment: opportunities and obstacles. *Curr. Drug Targets* 19(1), 1696–1709 (2018). <https://doi.org/10.2174/1389450119666180326122831> PMID: 29577855
5. Shaaban M. R., Farghaly T. A., Alsaedi A. M. R., Abdulwahab H. G. Microwaves assisted synthesis of antitumor agents of novel azoles, azines, and azoloazines pendant to phenyl sulfone moiety and molecular docking for VEGFR-2 kinase. *Journal of Molecular Structure* 1249 (2022) 131657
6. Almehmadi S. J., Alsaedi A. M. R., Harras M. F., Farghaly T. A. Synthesis of a new series of pyrazolo [1,5-a]pyrimidines as CDK2 inhibitors and anti-leukemia. *Bioorganic Chemistry* 117 (2021) 105431.
7. Mahmoud H. K., Gomha S. M., Farghaly T. A., Awad H. M. Synthesis of thiazole Linked imidazo[2,1-b]thiazoles as Anticancer agents. *Polycyclic aromatic compounds*, 2021, VOL. 41, NO. 8, 1608–1622.

8. Alsaedi A. M. R., Almeahmadi S. J., Farghaly T. A., Harras M. F., Khalil K. D. VEGFR2 and hepatocellular carcinoma inhibitory activities of trisubstituted triazole derivatives *Journal of Molecular Structure* 1250 (2022) 131832.
9. Sengel-Turk C. T., Gumustas M., Uslu B., Ozkan S. A. Chapter 10 - Nanosized Drug Carriers for Oral Delivery of Anticancer Compounds and the Importance of the Chromatographic Techniques. *Nano- and Microscale Drug Delivery Systems Design and Fabrication*, 2017, 165–195.
10. Hemalatha K., Madhumitha G., Kajbafvala A., Anupama N., Sompalle R., Roopan S. M. Function of Nanocatalyst in Chemistry of Organic Compounds Revolution: An Overview. *Journal of Nanomaterials*, 2013, ID 341015 | <https://doi.org/10.1155/2013/341015>
11. Alsaedi A. M. R., Farghaly T. A., Shaaban M. R. Fluorinated azole anticancer drugs: Synthesis, elaborated structure elucidation and docking studies *Arabian J. Chem.* (2022) 15, 103782.
12. Althagafi I. I., Abouzied A. S., Farghaly T. A., Al-Qurashi N. T., Alfaifi M. Y., Shaaban M. R., et al. Novel Nano-sized bis-indoline Derivatives as Antitumor Agents 391. *J. Heterocyclic Chem.*, 56, 391–399 (2019).
13. Ayati A, Emami S, Asadipour A, Shafiee A, Foroumadi A. Recent applications of 1,3-thiazole core structure in the identification of new lead compounds and drug discovery. *Eur. J. Med. Chem.* 97, 699–718 (2015). <https://doi.org/10.1016/j.ejmech.2015.04.015> PMID: 25934508
14. Keating GM. Dasatinib: a review in chronic myeloid leukaemia and Ph+ acute lymphoblastic leukaemia. *Drugs* 77(1), 85–96 (2017). <https://doi.org/10.1007/s40265-016-0677-x> PMID: 28032244
15. Lino CI, Gonçalves de Souza I, Borelli BM et al. Synthesis, molecular modeling studies and evaluation of antifungal activity of a novel series of thiazole derivatives. *Eur. J. Med. Chem.* 151, 248–260 (2018). <https://doi.org/10.1016/j.ejmech.2018.03.083> PMID: 29626797
16. Osman H, Yusufzai SK, Khan MS et al. New thiazolyl-coumarin hybrids: design, synthesis, characterization, x-ray crystal structure, antibacterial and antiviral evaluation. *J. Mol. Struct.* 1166, 147–154 (2018).
17. Djukic M, Fesatidou M, Xenikakis I et al. *In vitro* antioxidant activity of thiazolidinone derivatives of 1,3-thiazole and 1,3,4-thiadiazole. *Chem. Biol. Interact.* 286, 119–131 (2018).
18. Bondock S, Naser T, Ammar YA. Synthesis of some new 2-(3-pyridyl)-4,5-disubstituted thiazoles as potent antimicrobial agents. *Eur. J. Med. Chem.* 62, 270–279 (2013). <https://doi.org/10.1016/j.ejmech.2012.12.050> PMID: 23357308
19. Ahangar N, Ayati A, Alipour E, Pashapour A, Foroumadi A, Emami S. 1-[(2-arylthiazol-4-yl) methyl] azoles as a new class of anticonvulsants: design, synthesis, *in vivo* screening, and *in silico* drug-like properties. *Chem. Biol. Drug Des.* 78(5), 844–852 (2011).
20. Sharma RN, Xavier FP, Vasu KK, Chaturvedi SC, Pancholi SS. Synthesis of 4-benzyl-1,3-thiazole derivatives as potential anti-inflammatory agents: an analogue-based drug design approach. *J. Enzyme Inhib. Med. Chem.* 24(3), 890–897 (2009). <https://doi.org/10.1080/14756360802519558> PMID: 19469712
21. Mishra CB, Kumari S, Tiwari M. Thiazole: a promising heterocycle for the development of potent CNS active agents. *Eur. J. Med. Chem.* 92, 1–34 (2015). <https://doi.org/10.1016/j.ejmech.2014.12.031> PMID: 25544146
22. Shawali A. S., Samy N. A. Functionalized formazans: A review on recent progress in their pharmacological activities. *Journal of Advanced Research* (2015) 6, 241–254. <https://doi.org/10.1016/j.jare.2014.07.001> PMID: 26257923
23. YAĞLIOĞLU AŞ, ŞENÖZ H. Synthesis of novel 5-substituted phenyl-3-(p-isopropylphenyl)-1-phenyl-formazan and their biological activities. *Turkish Journal of Chemistry*. 2017 Dec 20; 41(6):883–891.
24. Khanna R, Palit G, Srivastava VK, Shanker K. Newer heterocycles of phenothiazine and their antiparkinsonian activity. *Indian J Chem* 1990; 29B:556–60.
25. Misra VS, Dhar S, Chowdhary BL. Synthesis of some newer formazans and tetrazolium salts as antiviral agents. *Pharmazie* 1978; 33(12):790–2. PMID: 746062
26. Tandel DC, Desai CM, Patel D, Naik B, Matjad S. Synthesis of quinolinyldiarylformazans as antitubercular/antibacterial agents. *Oriental J Chem* 2001; 17(3):529–30.
27. Bhosale JD, Shirolkar AR, Pete UD, Zade CM, Mahajan DP, Hadole CD, et al. Synthesis, characterization and biological activities of novel substituted formazans of 3,4-dimethyl-1Hpyrrole-2-carbohydrazide derivatives. *J Pharm Res* 2013; 7(7):582–7.
28. Kalsi R, Pande K, Bhalla TN, Parmar SS, Barthwal JP. Novel formazans as potent anti-inflammatory and analgesic agents. *Pharmacology* 1988; 37:218–24. <https://doi.org/10.1159/000138469> PMID: 3264073
29. Bhardwaj SD, Jolly VS. Synthesis, anti-HIV and anticancer activities of some new formazans. *Asian J Chem* 1997; 9:48–51.

30. Khattab T, Haggag KM. Synthesis and spectral properties of symmetrical and asymmetrical 3-cyano-1, 5-diarylformazan dyestuffs for dyeing polyester fabrics. *Egyptian Journal of Chemistry*. 2017 Dec 1; 60.
31. Farghaly T. A., Abbas E. M. H., Al-Soliemy A. M., Sabour R., and Shaaban M. R., Novel sulfonyl thiazolyl-hydrazone derivatives as EGFR inhibitors: Design, synthesis, biological evaluation and molecular docking studies, *Bioorganic Chemistry* 121 (2022): 105684. <https://doi.org/10.1016/j.bioorg.2022.105684> PMID: 35183860
32. Alsharekh M.M., Althagafi I.I., Shaaban M.R. et al. Microwave-assisted and thermal synthesis of nano-sized thiazolyl-phenothiazine derivatives and their biological activities. *Res Chem Intermed* 45, 127–154 (2019). <https://doi.org/10.1007/s11164-018-3594-7>
33. Alhasani M. A., Farghaly T. A., and El-Ghamry H. A., Mono and bimetallic complexes of pyrazolone based ligand: Synthesis, characterization, antitumor and molecular docking studies, *Journal of Molecular Structure* 1249 (2022): 131607.
34. Al-Soliemy A. M., Sabour R., and Farghaly T. A. Pyrazoles and Fused Pyrimidines: Synthesis, Structure Elucidation, Antitubercular Activity and Molecular Docking Study, *Medicinal Chemistry* 18 (2022): 181–198. <https://doi.org/10.2174/1573406417666210324131951> PMID: 33761862
35. Almehmadi S. J., Alsaedi A. M. R., Harras M. F., and Farghaly T. A. Synthesis of a new series of pyrazolo[1,5-a]pyrimidines as CDK2 inhibitors and anti-leukemia, *Bioorganic Chemistry* 117 (2021): 105431.
36. Abbas E. M. H., Gomha S. M., Farghaly T. A., Abdalla M. M. Synthesis of new thiazole derivatives as antitumor agents. *Current Organic Synthesis*, 2016, 13(3), 456–465.
37. Gomha S. M., Farghaly T. A., Alqurashi N. T., Abdou H. Y., Mousa E. K. Synthesis, Molecular docking and anticancer evaluation of new arylazothiazoles. *Current of Organic Synthesis*, 2017, 14, 620–631.
38. Santana T. I., Barbosa M. O., Gomes P. A. T. M., Cruz A. C. N., Silva T. G., Leite A. C. L. Synthesis, anticancer activity and mechanism of action of new thiazole derivatives. *European Journal of Medicinal Chemistry*, 2018, 144, 874–886. <https://doi.org/10.1016/j.ejmech.2017.12.040> PMID: 29329071
39. Shaaban M. R., Farghaly T. A., Alsaedi A. M. R. Synthesis, Antimicrobial and Anticancer Evaluations of Novel Thiazoles Incorporated Diphenyl Sulfone Moiety. *Polycyclic Aromatic Compounds*, 2022, inpress. <https://doi.org/10.1080/10406638.2020.1837887>
40. Farghaly T. A., Masaret G. S., Muhammad Z. A., Harras M. F. Discovery of thiazole-based-chalcones and 4-hetarylthiazoles as potent anticancer agents: Synthesis, docking study and anticancer activity. *Bioorganic Chemistry*, 2020, 98, 103761. <https://doi.org/10.1016/j.bioorg.2020.103761> PMID: 32200332
41. Morigi Rita, Locatelli Alessandra, Leoni Alberto and Rambaldi Mirella, Recent Patents on Thiazole Derivatives Endowed with Antitumor Activity, *Recent Patents on Anti-Cancer Drug Discovery*, Volume 10, Issue 3, 2015, Page: [280–297], <https://doi.org/10.2174/1574892810666150708110432> PMID: 26152151
42. Prabodh ChanderSharma Kushal KumarBansal, Archana Sharma, Diksha Sharma, Aakash Deep, Thiazole-containing compounds as therapeutic targets for cancer therapy, *European Journal of Medicinal Chemistry*, Volume 188, 15 February 2020, 112016, <https://doi.org/10.1016/j.ejmech.2019.112016> PMID: 31926469
43. Altıntop M.D.; Sever B.; Akalın Çiftçi G.; Özdemir A. Design, Synthesis, and Evaluation of a New Series of Thiazole-Based Anticancer Agents as Potent Akt Inhibitors. *Molecules* 2018, 23, 1318. <https://doi.org/10.3390/molecules23061318> PMID: 29857484
44. Dasari Shaloam, Bernard Paul, Tchounwou, Cisplatin in cancer therapy: Molecular mechanisms of action, *European Journal of Pharmacology*, Volume 740, 5 October 2014, Pages 364–378, <https://doi.org/10.1016/j.ejphar.2014.07.025>
45. Magda H. Abdellattif, Hossam Nada, and Ahmed Elkamhawy, Synthesis, Biological Evaluation, and In Silico Studies of New Heterocycles Incorporating 4,5,6,7-Tetrabromophthalimide Moiety as Potential Antibacterial and Anticancer Agents <https://doi.org/10.3987/COM-21-14535>
46. Kim R., Tanabe K., Uchida Y. et al. Current status of the molecular mechanisms of anticancer drug-induced apoptosis. *Cancer Chemother Pharmacol* 50, 343–352 (2002). <https://doi.org/10.1007/s00280-002-0522-7>
47. Guzmán L., Villalón K., Marchant M.J. et al. In vitro evaluation and molecular docking of QS-21 and quillaic acid from *Quillaja saponaria* Molina as gastric cancer agents. *Sci Rep* 10, 10534 (2020). <https://doi.org/10.1038/s41598-020-67442-3>
48. Abdellattif MH, Abdel-Rahman AAH, Arief MMH, Mounieir SM, Ali A, Hussien MA, et al. (2021) Novel 2-Hydroselenonicotinonitriles and Selenopheno[2, 3-b]pyridines: Efficient Synthesis, Molecular Docking-DFT Modeling and Antimicrobial Assessment. *Front. Chem.* 9:672503. <https://doi.org/10.3389/fchem.2021.672503> PMID: 34041224

49. Govindarasu Mydhili, Ganeshan Shalini, Ansari Mohammad Azam, Alomary Mohammad N., AlYahya Sami, Alghamdi Saad, et al, In silico modeling and molecular docking insights of kaempferitrin for colon cancer-related molecular targets, *Journal of Saudi Chemical Society* (2021) 25, 101319, <https://doi.org/10.1016/j.jscs.2021.101319>
50. Razak S., Afsar T., Bibi N. et al. Molecular docking, pharmacokinetic studies, and in vivo pharmacological study of indole derivative 2-(5-methoxy-2-methyl-1H-indole-3-yl)-N'-[(E)-(3-nitrophenyl) methylidene] acetohydrazide as a promising chemoprotective agent against cisplatin induced organ damage. *Sci Rep* 11, 6245 (2021). <https://doi.org/10.1038/s41598-021-84748-y> PMID: 33737575
51. Liebowitz L. D.; Ashbee H. R.; Evans E. G. V.; Chong Y.; Mallatova N.; Zaidi M.; et al. *Diagn. Microbiol. Infect. Dis.* 2002, 4, 27-33.
52. Howsai H.B.; Basaleh A.S.; Abdellattif M.H.; Hassan W.M.I.; Hussien M.A. Synthesis, Structural Investigations, Molecular Docking, and Anticancer Activity of Some Novel Schiff Bases and Their Uranyl Complexes. *Biomolecules* 2021, 11, 1138. <https://doi.org/10.3390/biom11081138> PMID: 34439805
53. Lobinski R., Edmonds J., Suzuki K., and Uden P. (2000). Species-selective determination of selenium compounds in biological materials. *Pure Appl. Chem.* 72, 447–462. <https://doi.org/10.1351/pac200072030447>
54. Lipinski C. A., Lombardo F., Dominy B. W., and Feeney P. J. (1997) Experimental and computational approaches to estimate solubility and permeability in drug discovery and development settings. *Adv. Drug Deliv. Rev.* 23, 3–25. [https://doi.org/10.1016/S0169-409X\(96\)00423-1](https://doi.org/10.1016/S0169-409X(96)00423-1)
55. Murad H.A.S., Alqurashi T.M.A. & Hussien M.A. Interactions of selected cardiovascular active natural compounds with CXCR4 and CXCR7 receptors: a molecular docking, molecular dynamics, and pharmacokinetic/toxicity prediction study. *BMC Complement Med Ther* 22, 35 (2022). <https://doi.org/10.1186/s12906-021-03488-8> PMID: 35120520
56. Elkamhawy A.; Ammar U.M.; Paik S.; Abdellattif M.H.; Elsherbeny M.H.; Lee K.; et al. Scaffold Repurposing of In-House Small Molecule Candidates Leads to Discovery of First-in-Class CDK-1/HER-2 Dual Inhibitors: In Vitro and In Silico Screening. *Molecules* 2021, 26, 5324. <https://doi.org/10.3390/molecules26175324> PMID: 34500757
57. Farghaly T. A., Abdallah M. A., Mahmoud H. K. Regio- and Site Selectivity in the Reactions of Hydrazonoyl Chlorides with 3-substituted Indolin-2-one Derivatives. *J. Heterocycl. Chem.*, 2017, 54, 1450–1456.
58. Cullity B. D.; *Elements of X-ray Diffraction*, second ed. Addison-Wesley, Massachusetts, 1978.
